# Supplementary material for: Observed Evidences of Frequency-Dependent Site Amplification Due to Structural Control of Active Reverse Faults at Different Localities in Japan
Source: Research Square preprint supplement (doi:10.21203/rs.3.rs-606889/v2), 2021-09-29
Supplement: Supplementary file 1 [file 4839f39ef9188dcd3a586b64.pdf]

# **Supplementary Material**

## **Observed Evidence of Frequency-Dependent Site Amplification Due to Structural Control of Active Reverse Faults at Different Localities in Japan**

### **TABLE OF CONTENTS:**

□ *Supplementary Figures S1-S29*

□ *Supplementary Tables S1-S3*

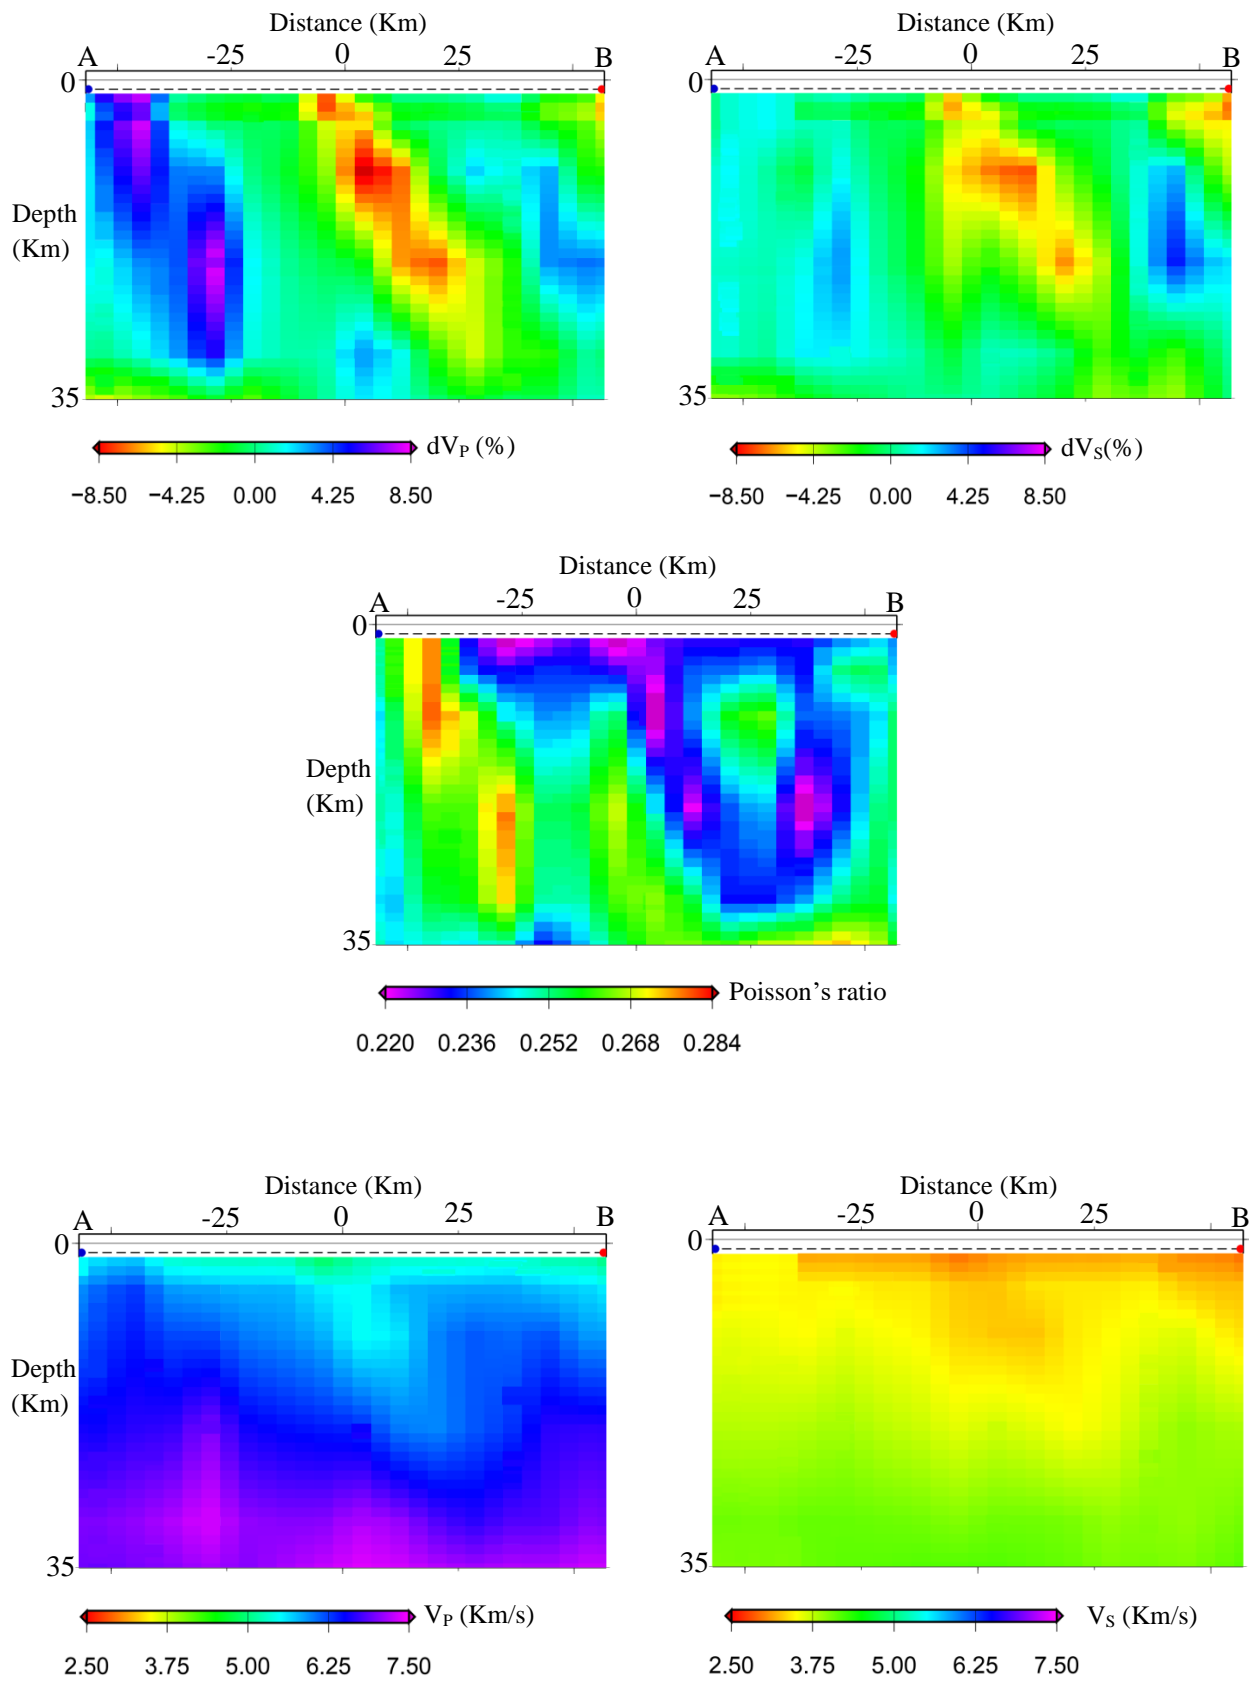

Figure S1: Subsurface tomography structures along profile AB in East Hokkaido study area.

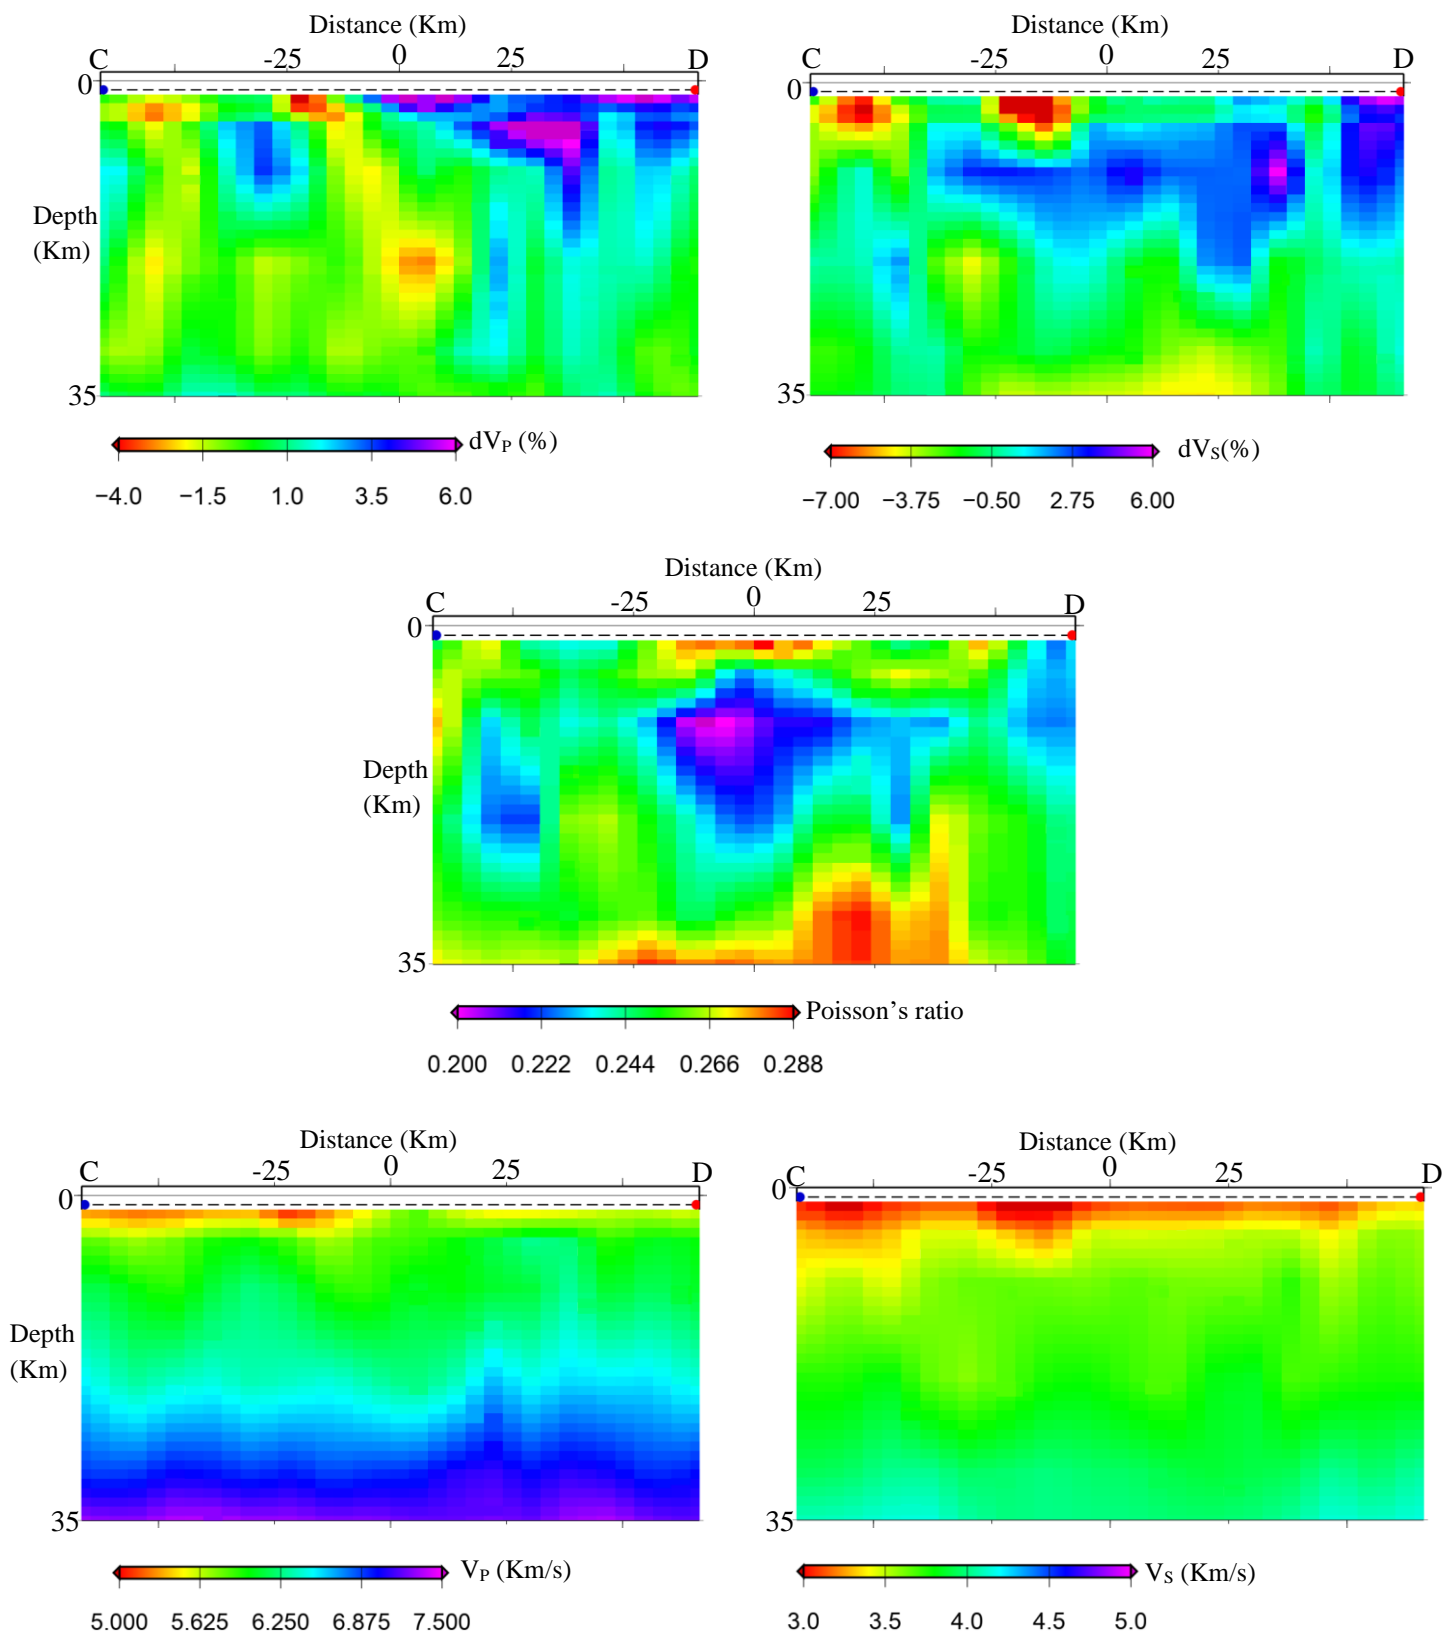

Figure S2: Subsurface tomography structures along profile CD in Akita-Iwate study area.

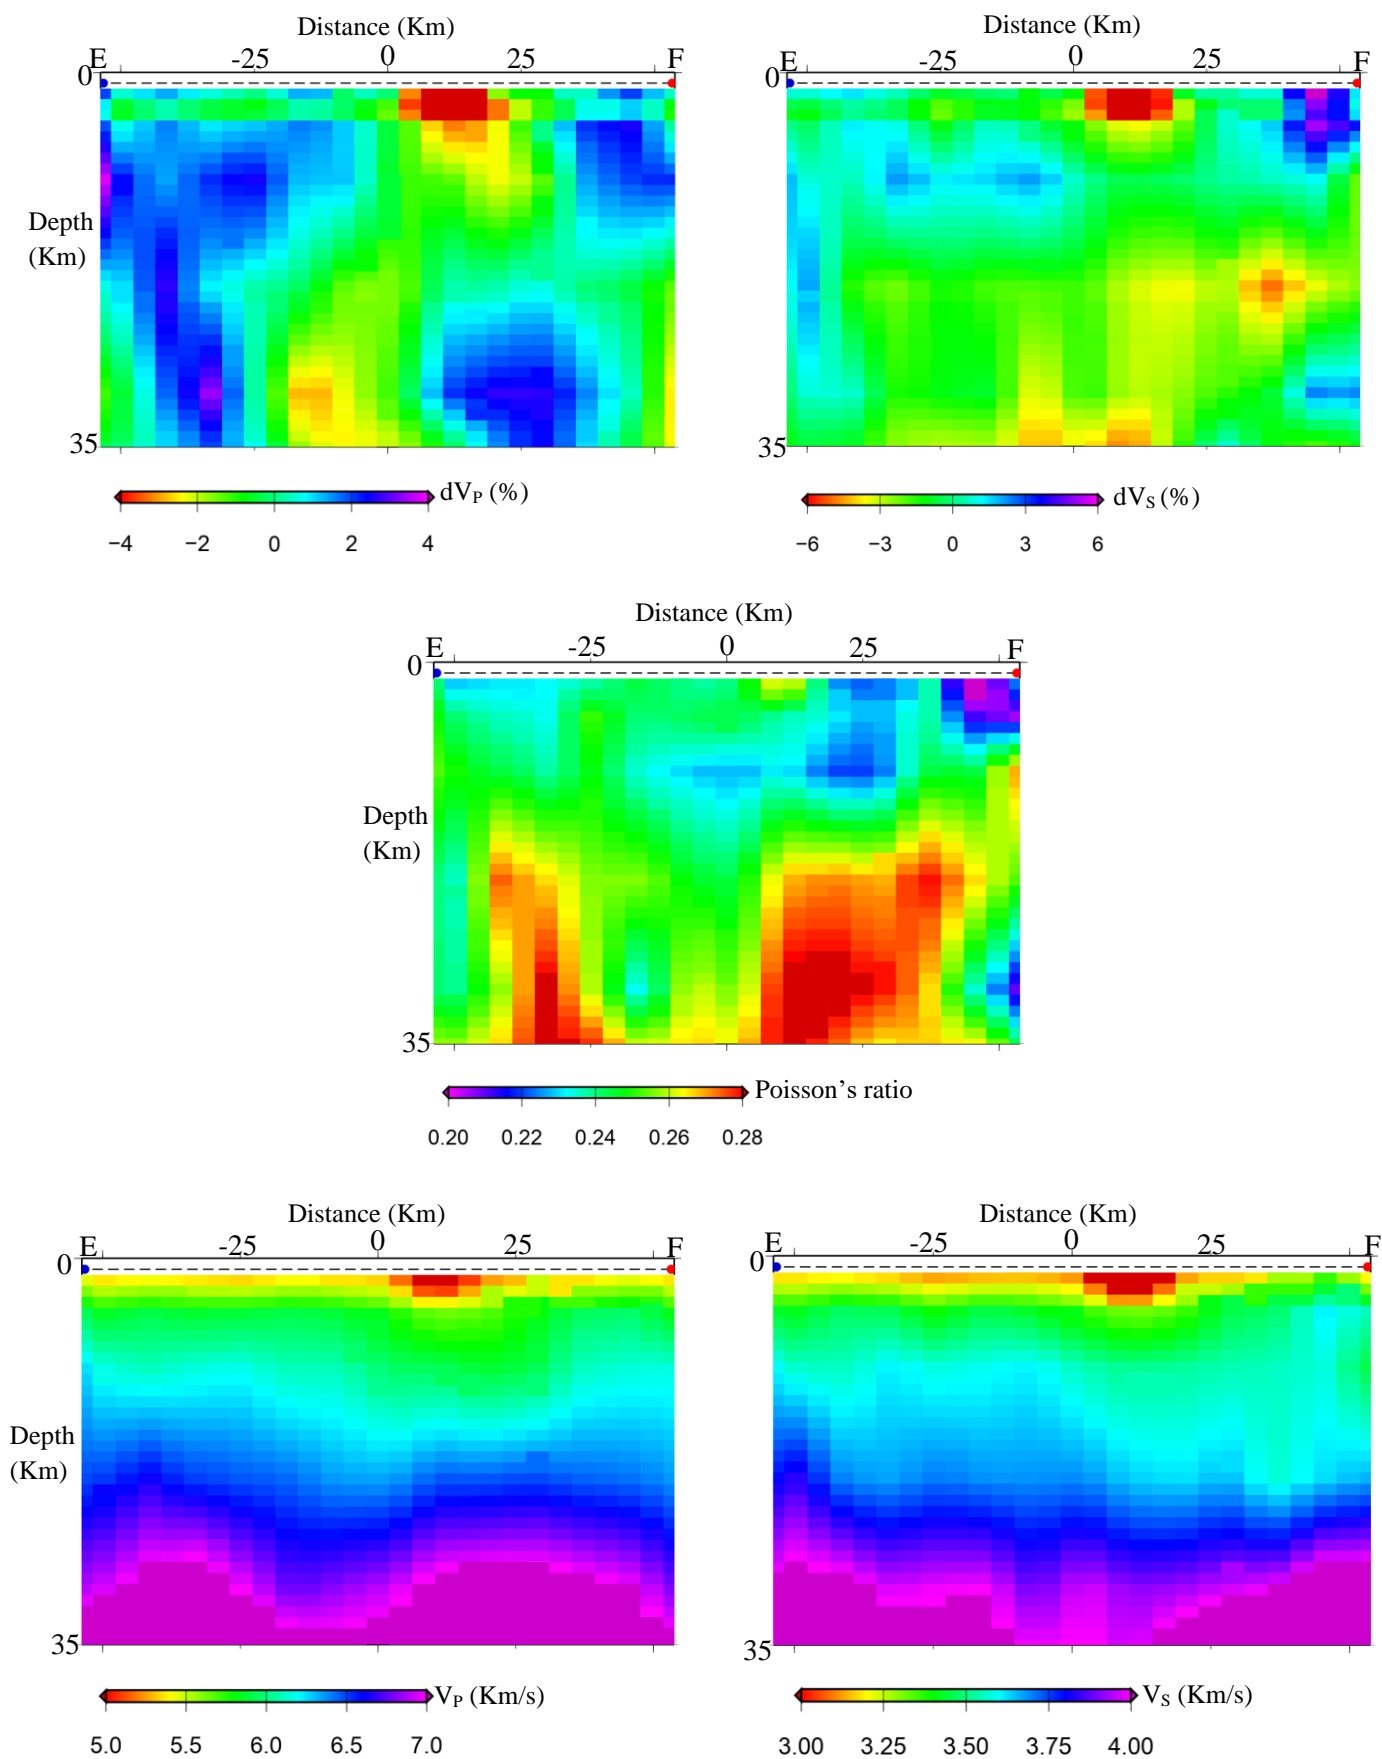

Figure S3: Subsurface tomography structures along profile EF in Akita-Iwate study area.

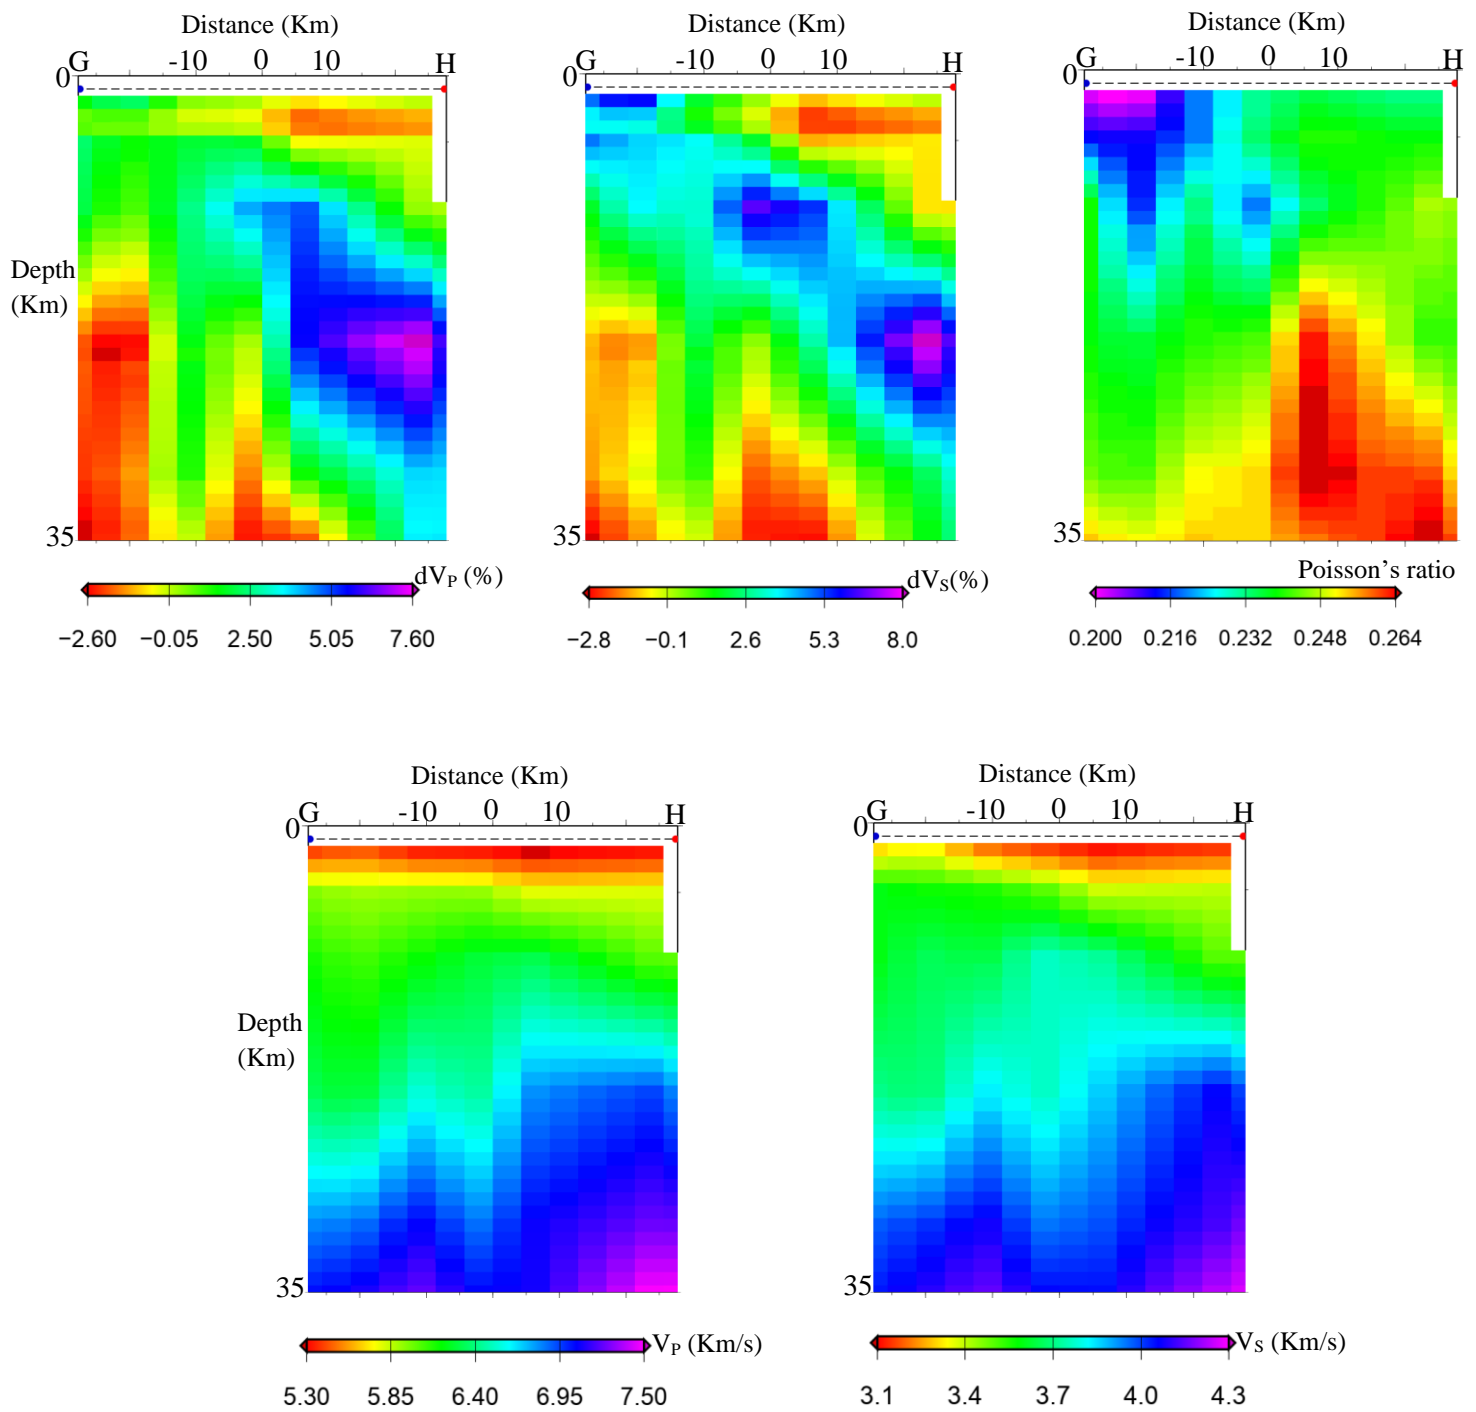

Figure S4: Subsurface tomography structures along profile GH in Fukushima study area based on calculation by Nakamura *et al.* (2008).

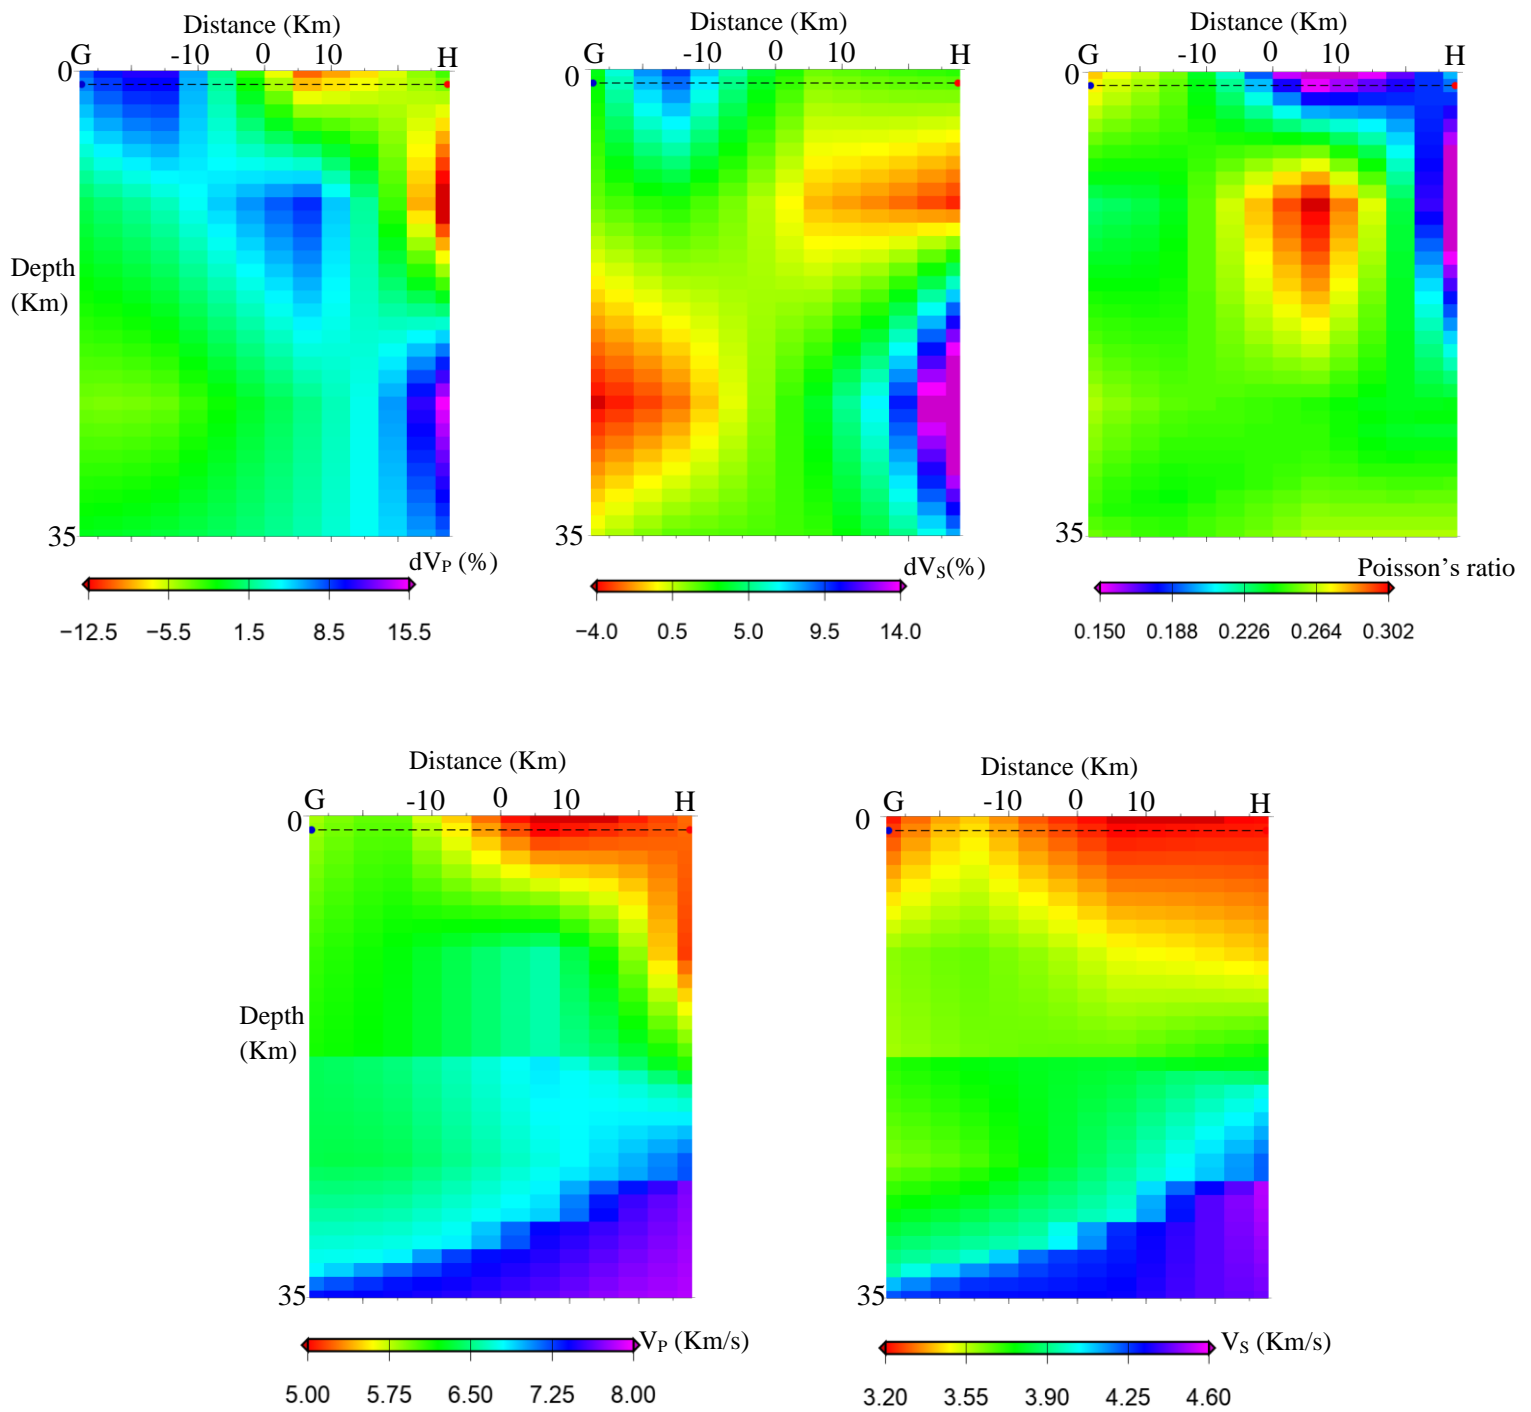

Figure S5: Subsurface tomography structures along profile GH in Fukushima study area based on calculation by Nakajima *et al.* (2001).

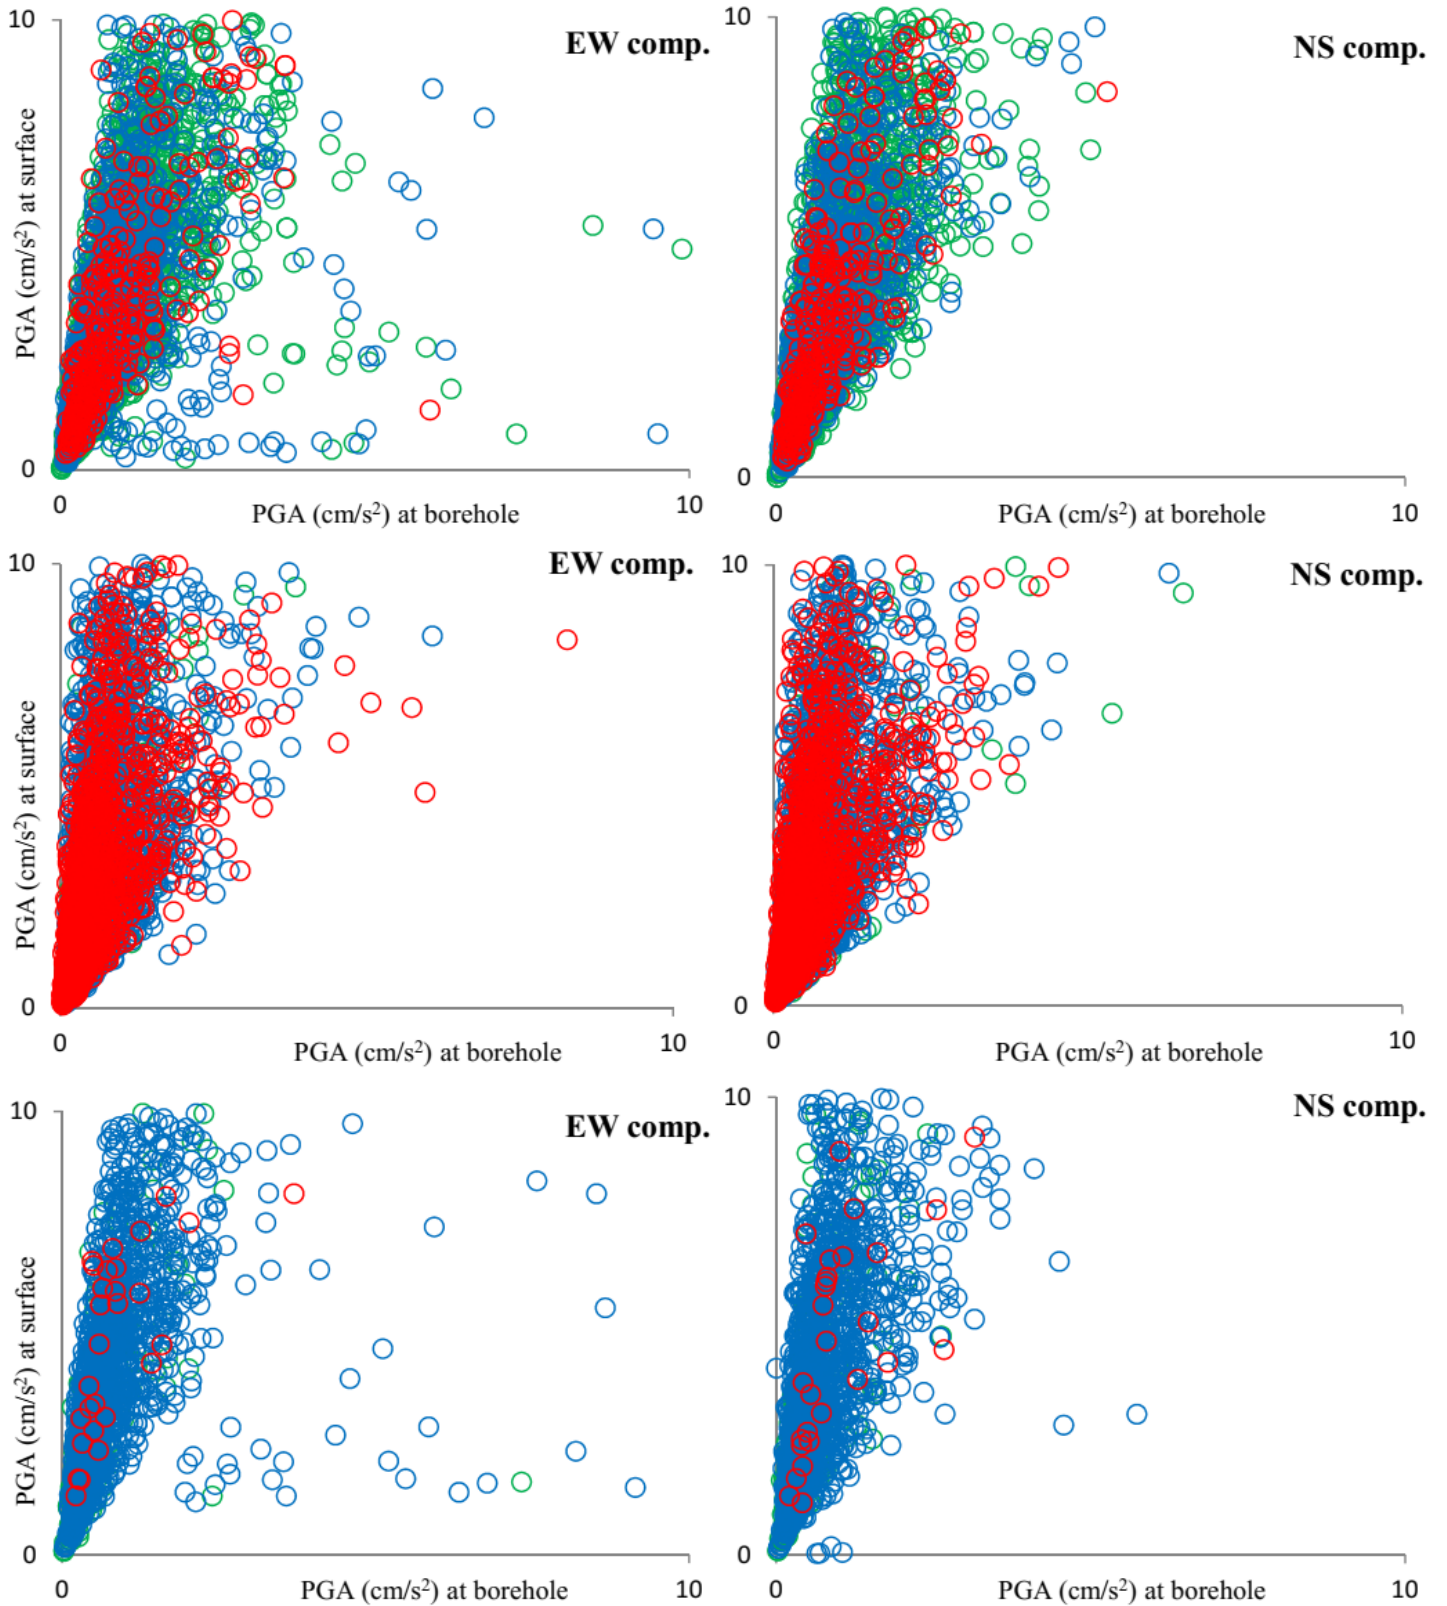

Figure S6: Correlation between PGAs of EW and NS components at surface and borehole obtained from KiK-net stations at the East Hokkaido (upper), Akita-Iwate (middle), and Fukushima (lower) study areas. (Note: colors of green, blue, and red are used to discriminate PGAs on HW (l.FW in the Akita-Iwate study area), FW (r.FW in Akita-Iwate study area), and FZ (upthrown blocks in the Akita-Iwate study area), respectively)

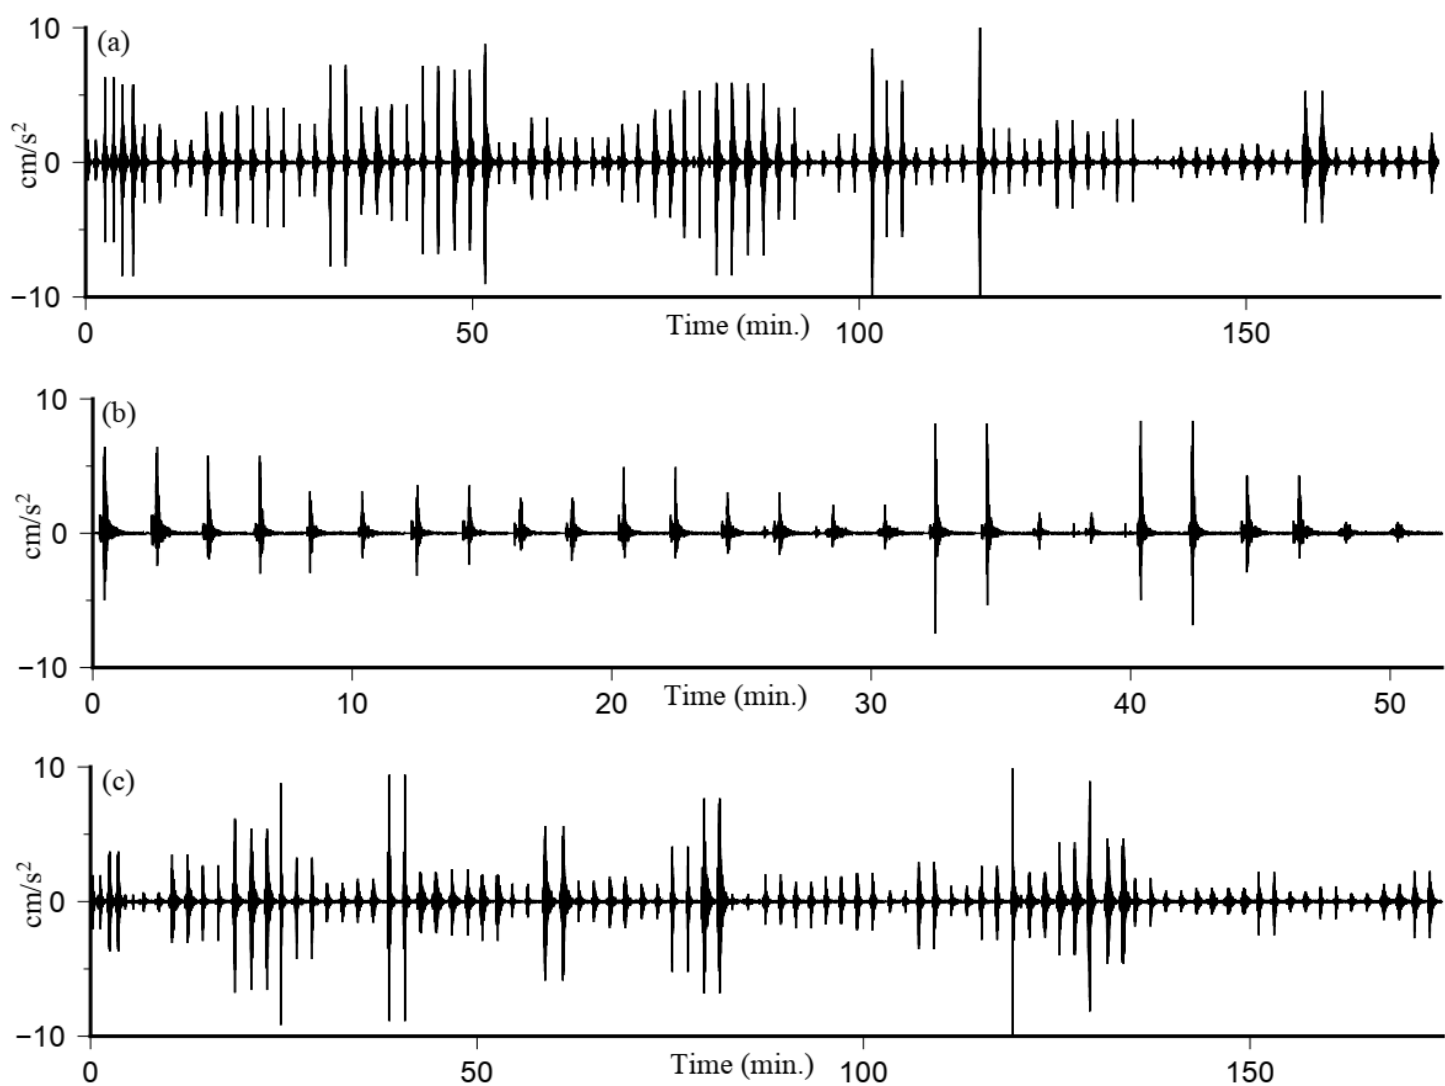

Figure S7: Example of continuous time series of EW components recorded at TKCH05 KiK-net station with their hypocenters located beneath FW (a), FZ (b), HW (c).



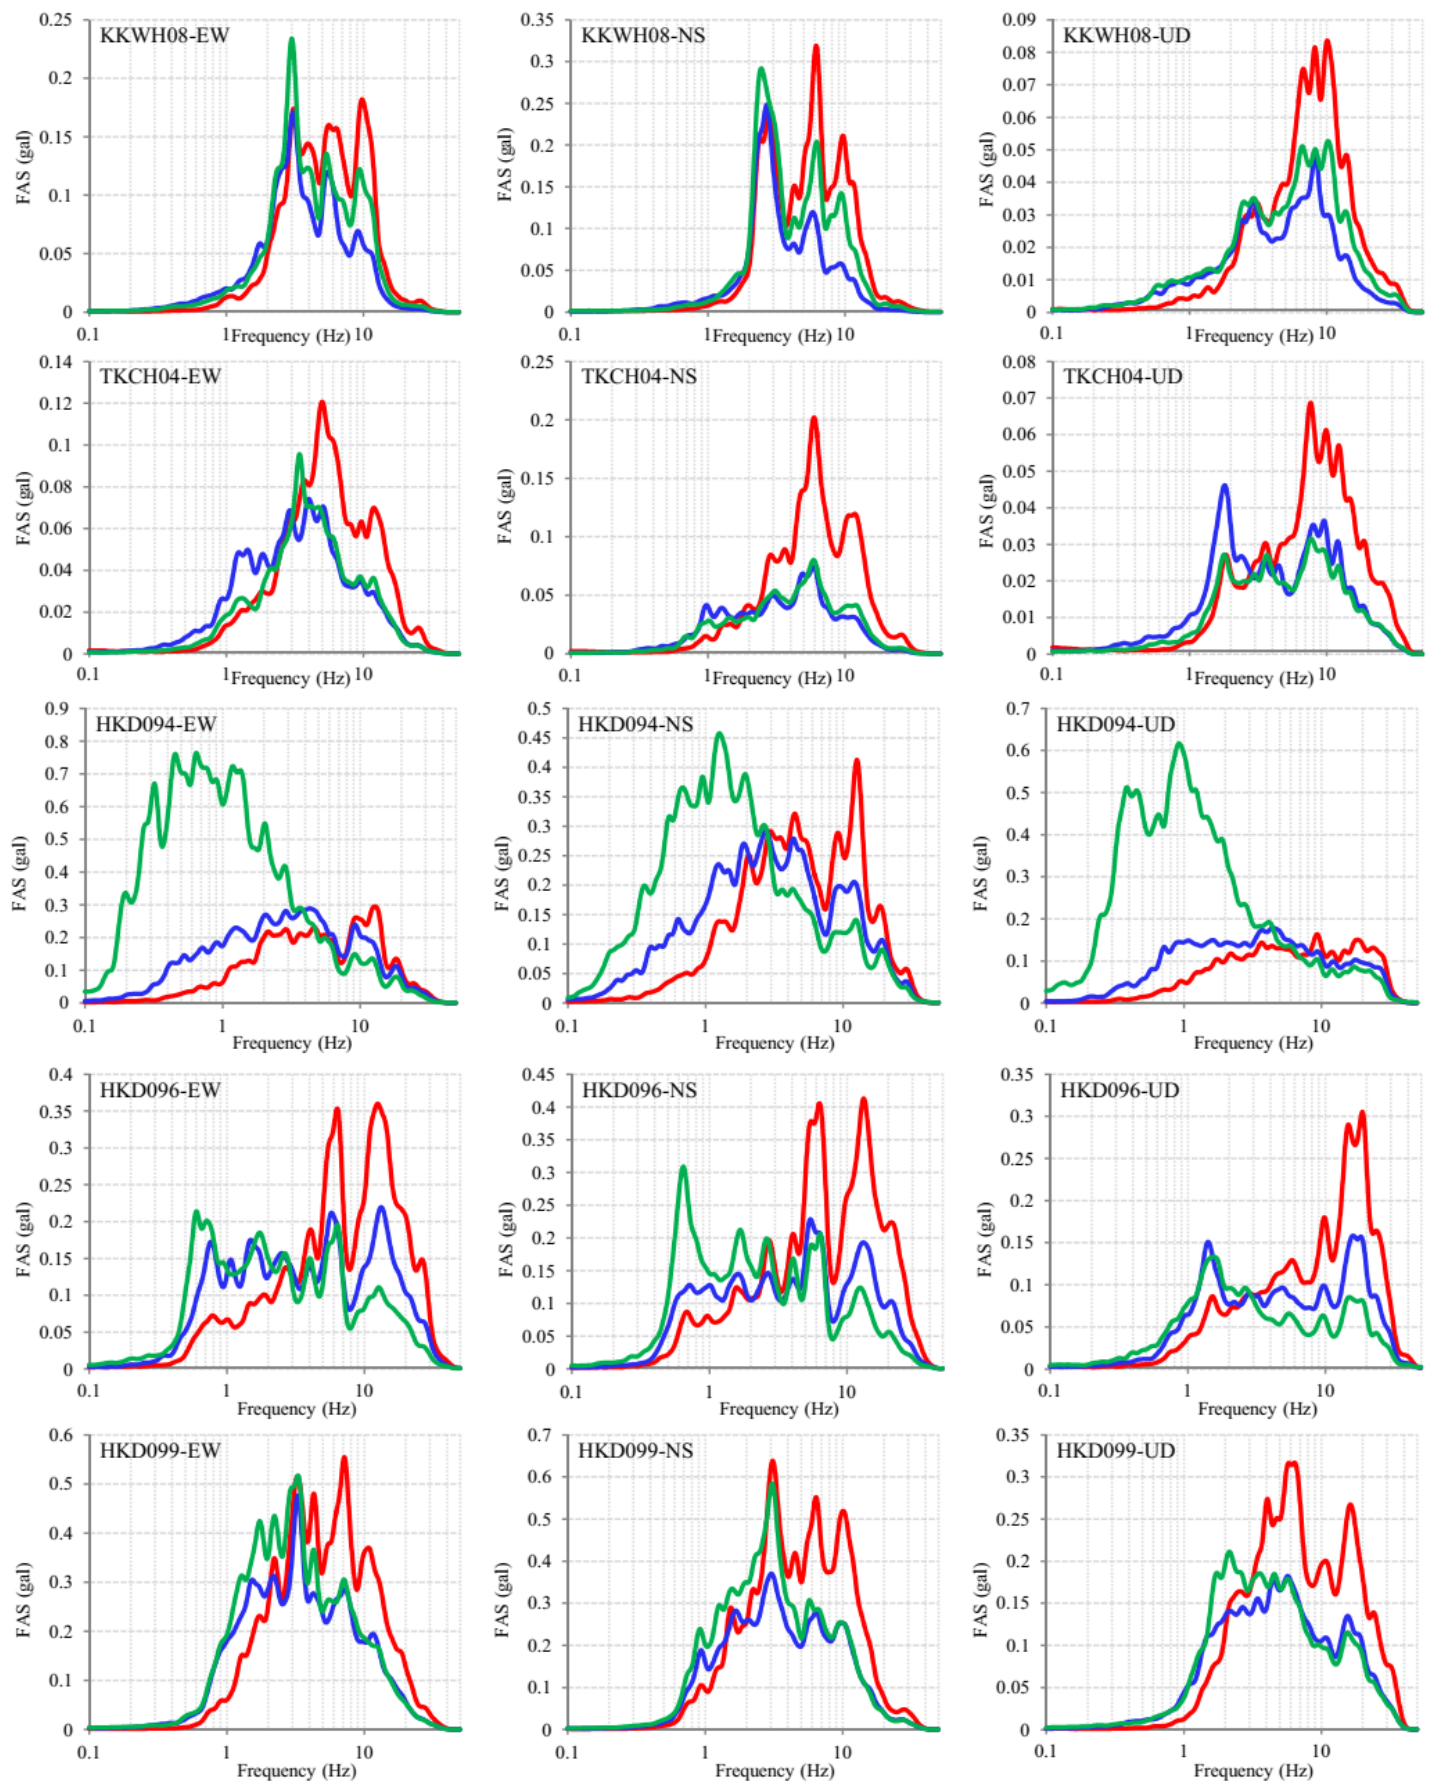

Figure S8: FASs at seismic stations located on FW block in the East Hokkaido study area due to recorded EFWs (blue), EFZs (red), and EHWs (green).

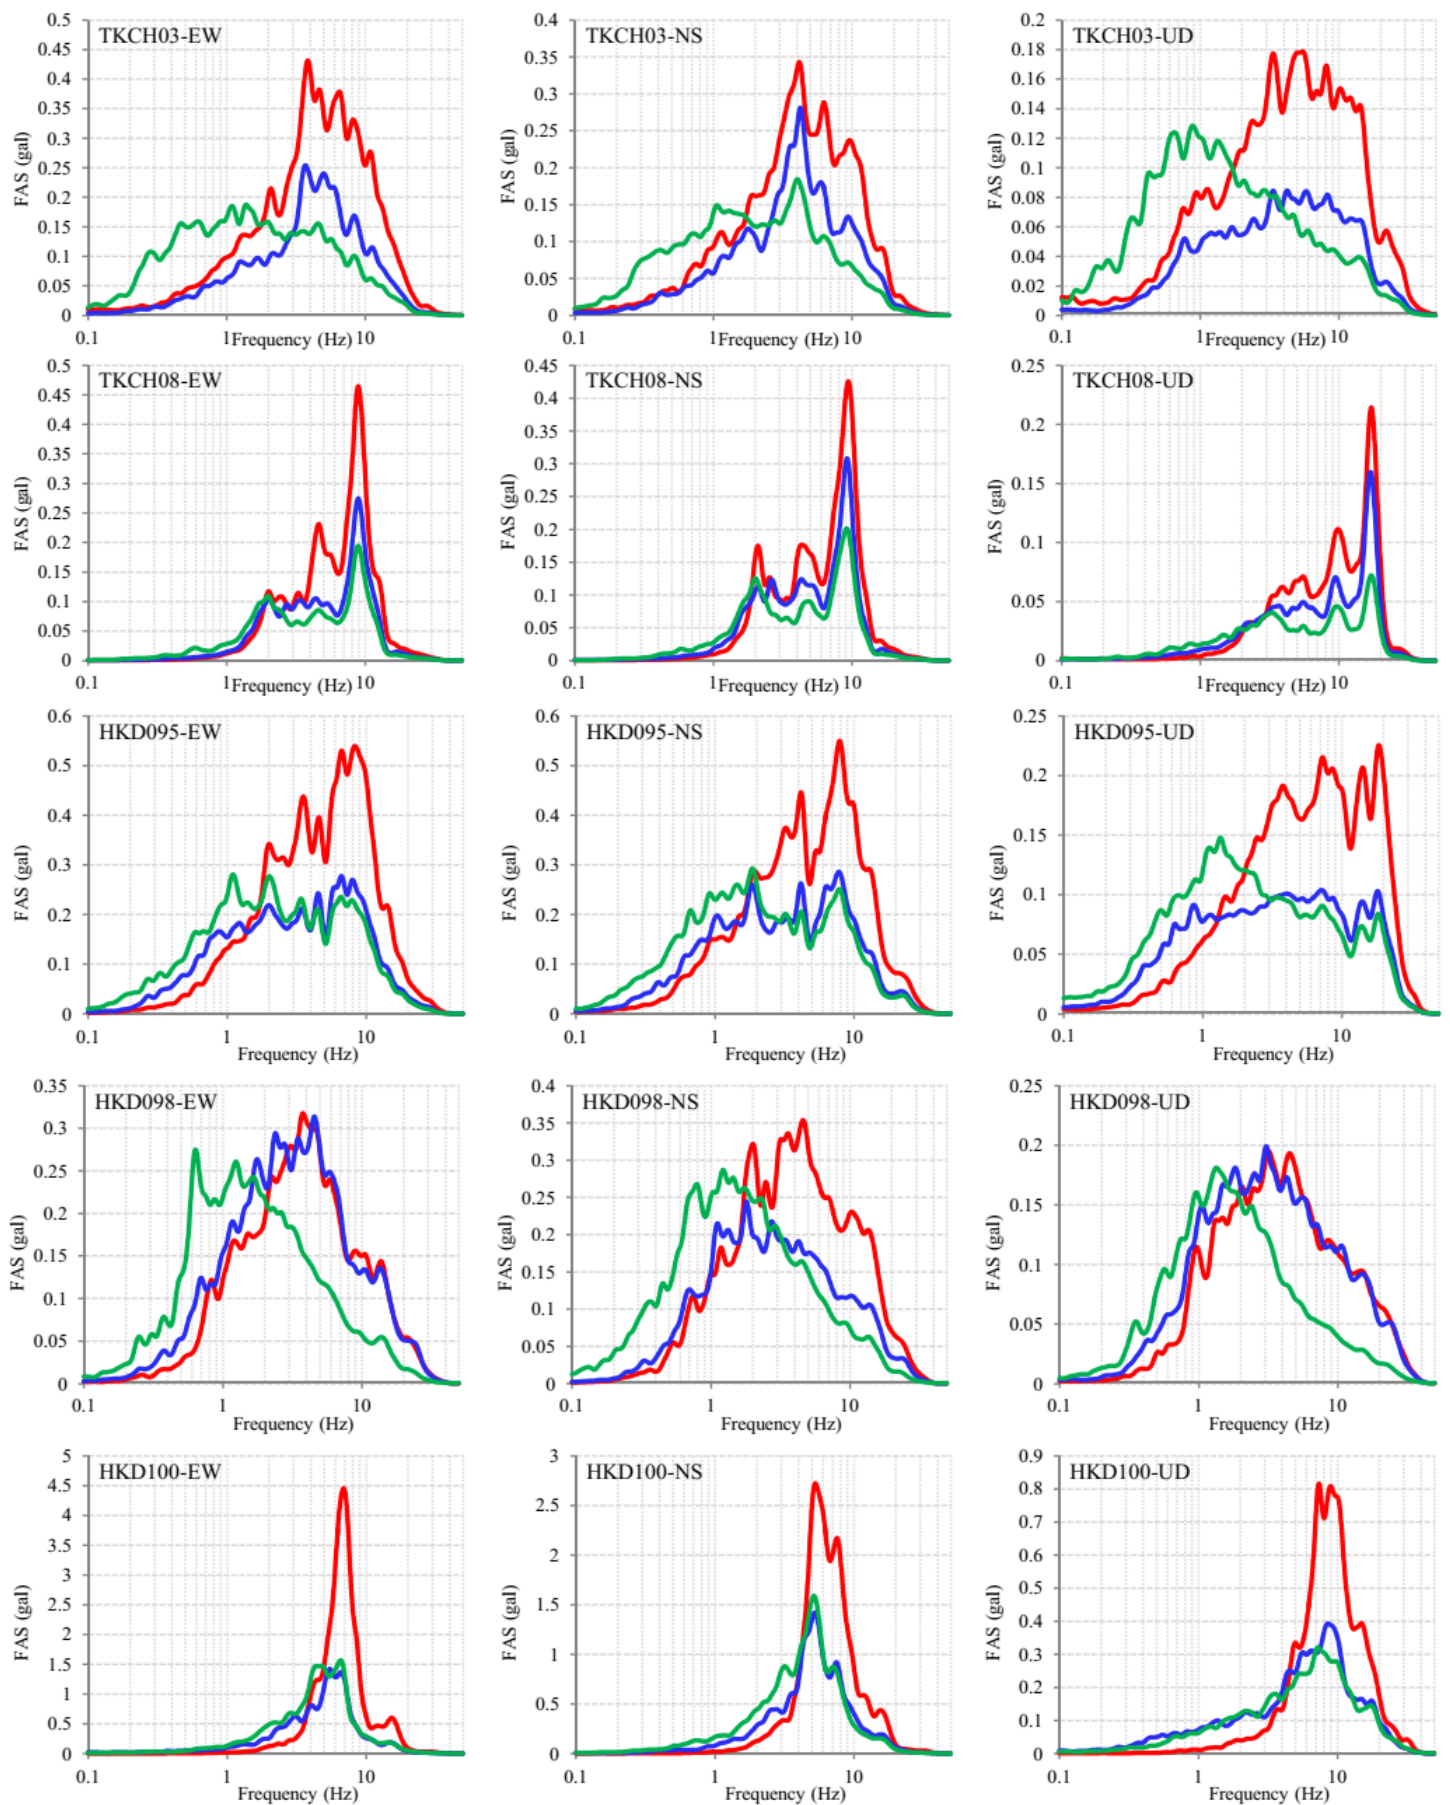

Figure S9: FASs at seismic stations located on FZ in the East Hokkaido study area due to recorded EFWs (blue), EFZs (red), and EHWs (green).



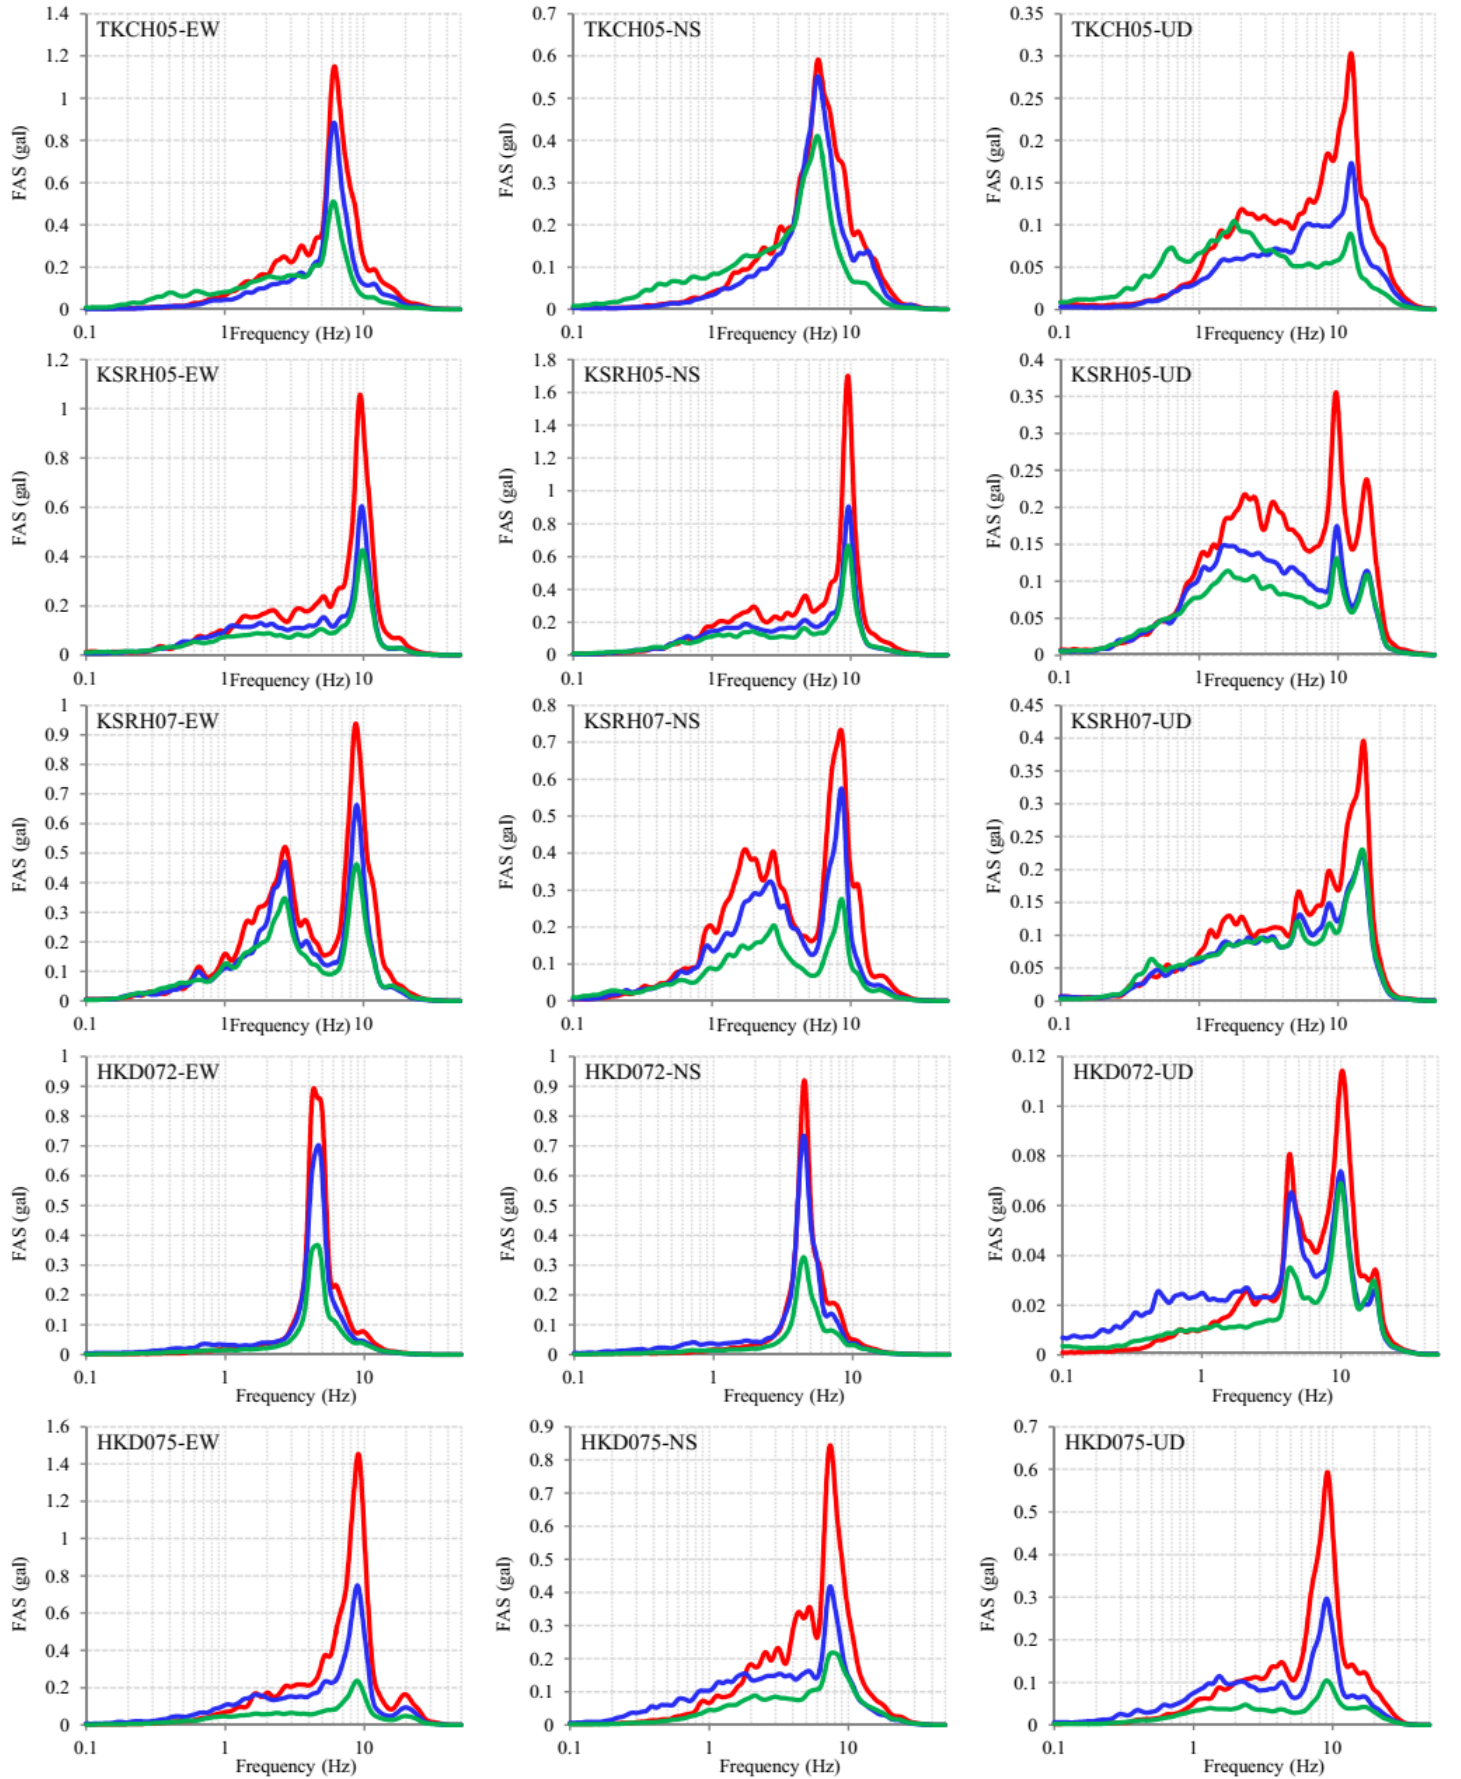

Figure S10: FASs at seismic stations located on HW block in the East Hokkaido study area due to recorded EFWs (blue), EFZs (red), and EHWs (green).

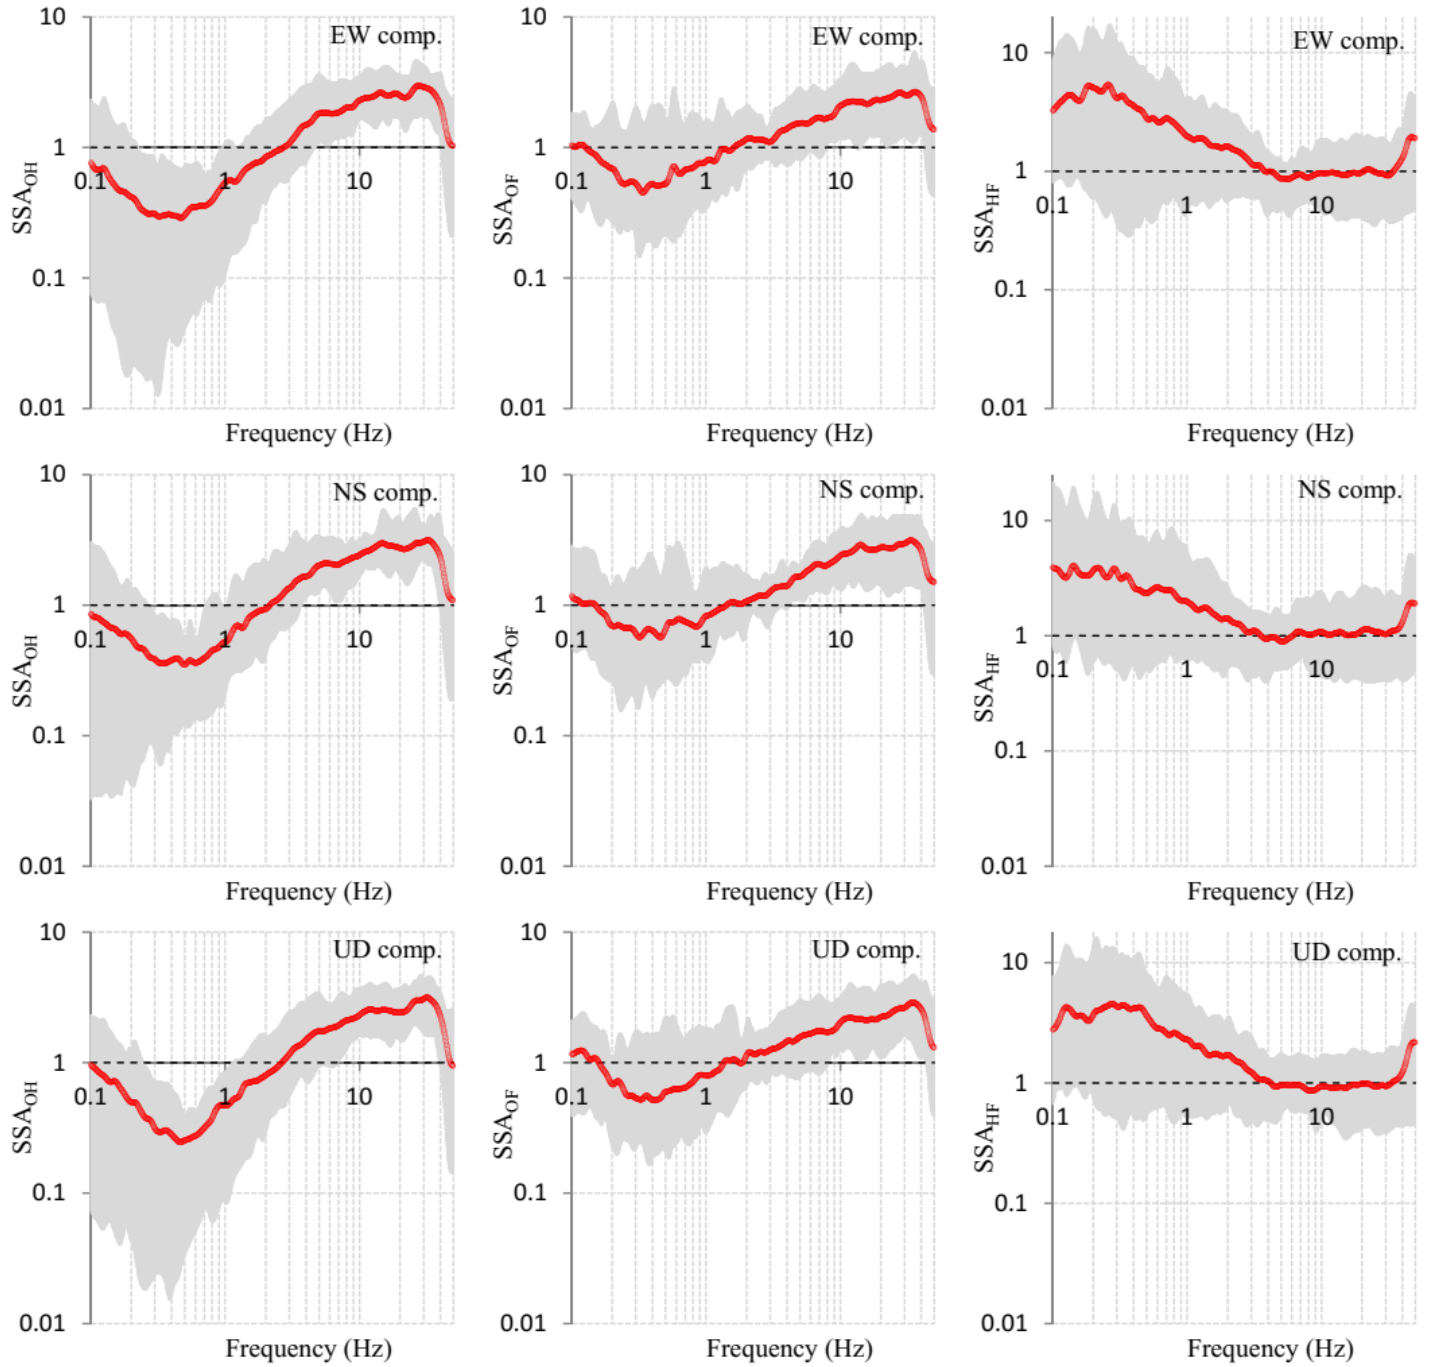

Figure S11: The estimated average SSAs (red) with their minimum and maximum (gray), which are calculated based on equations 1, 2, and 3 for the seismic stations located on the FW block in East Hokkaido study area.

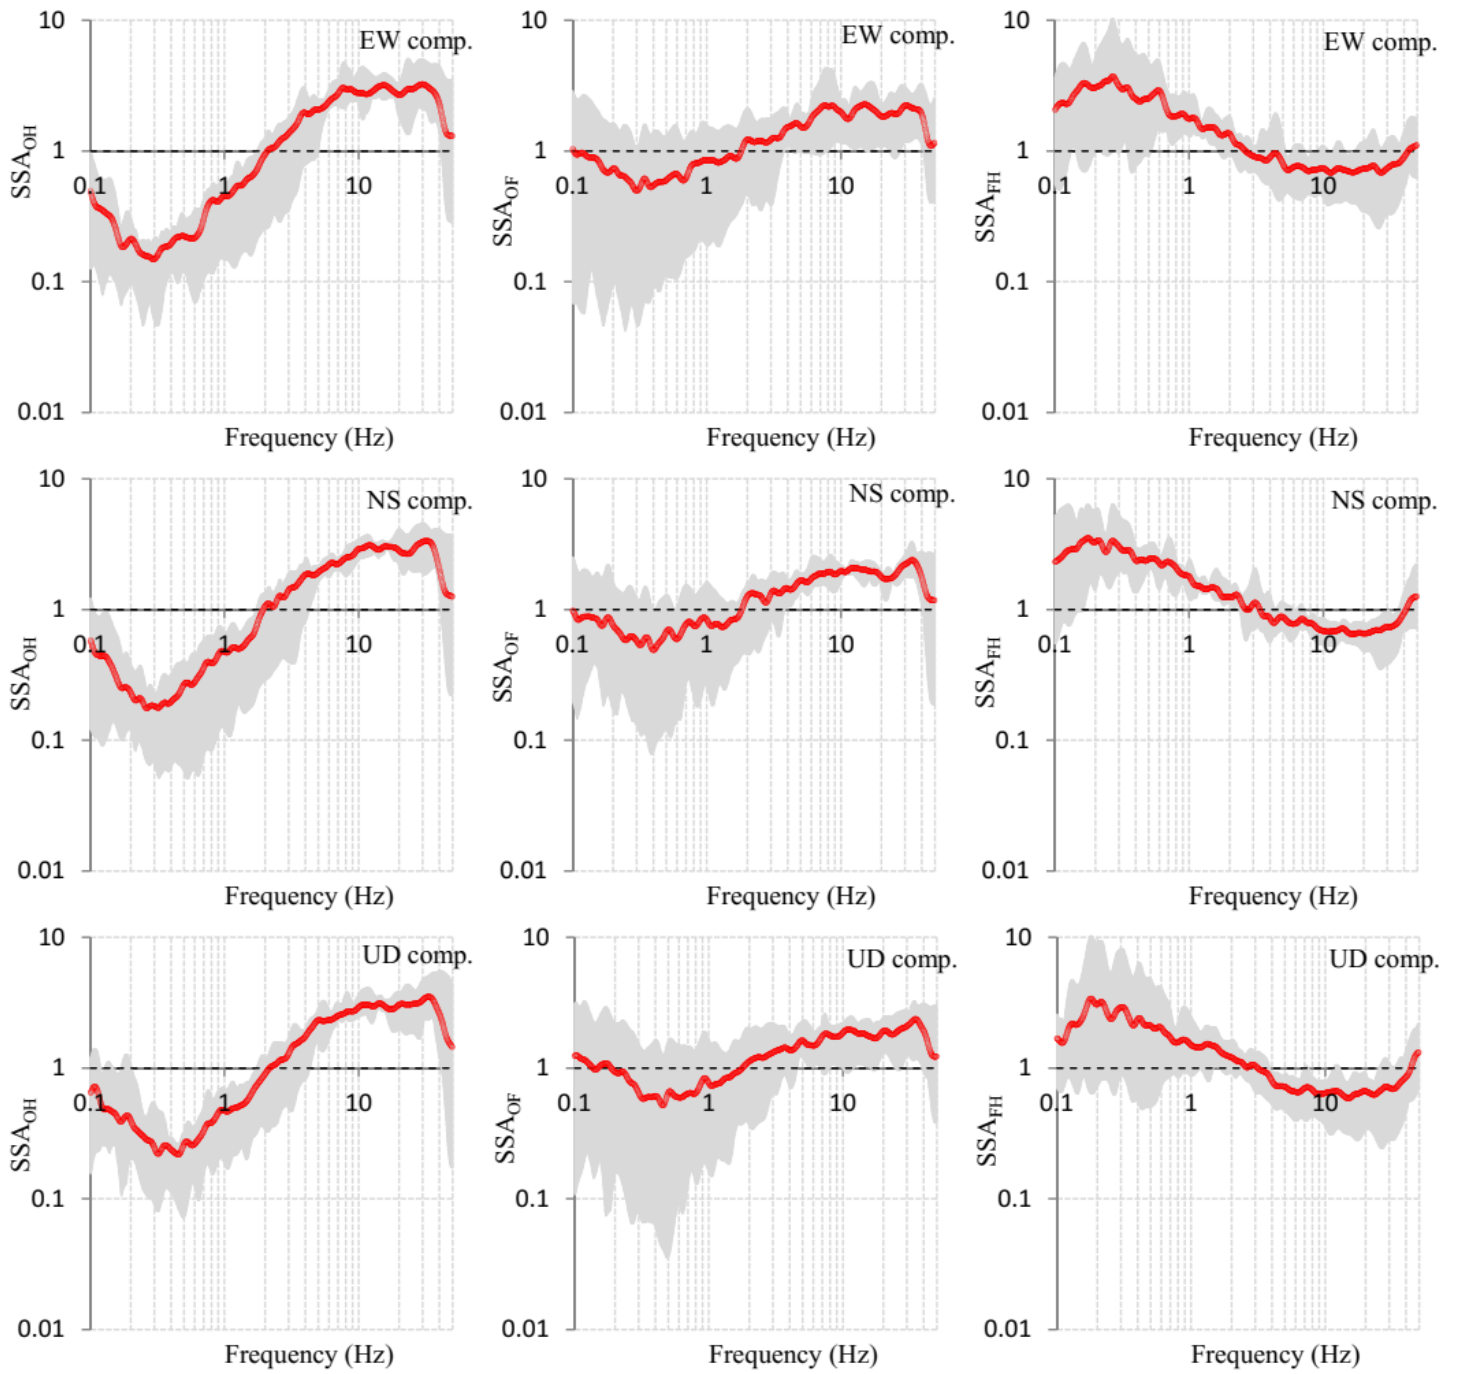

Figure S12: The estimated average SSAs (red) with their minimum and maximum (gray), which are calculated based on equations 1, 2, and 4 for the seismic stations located on the FZ in East Hokkaido study area.

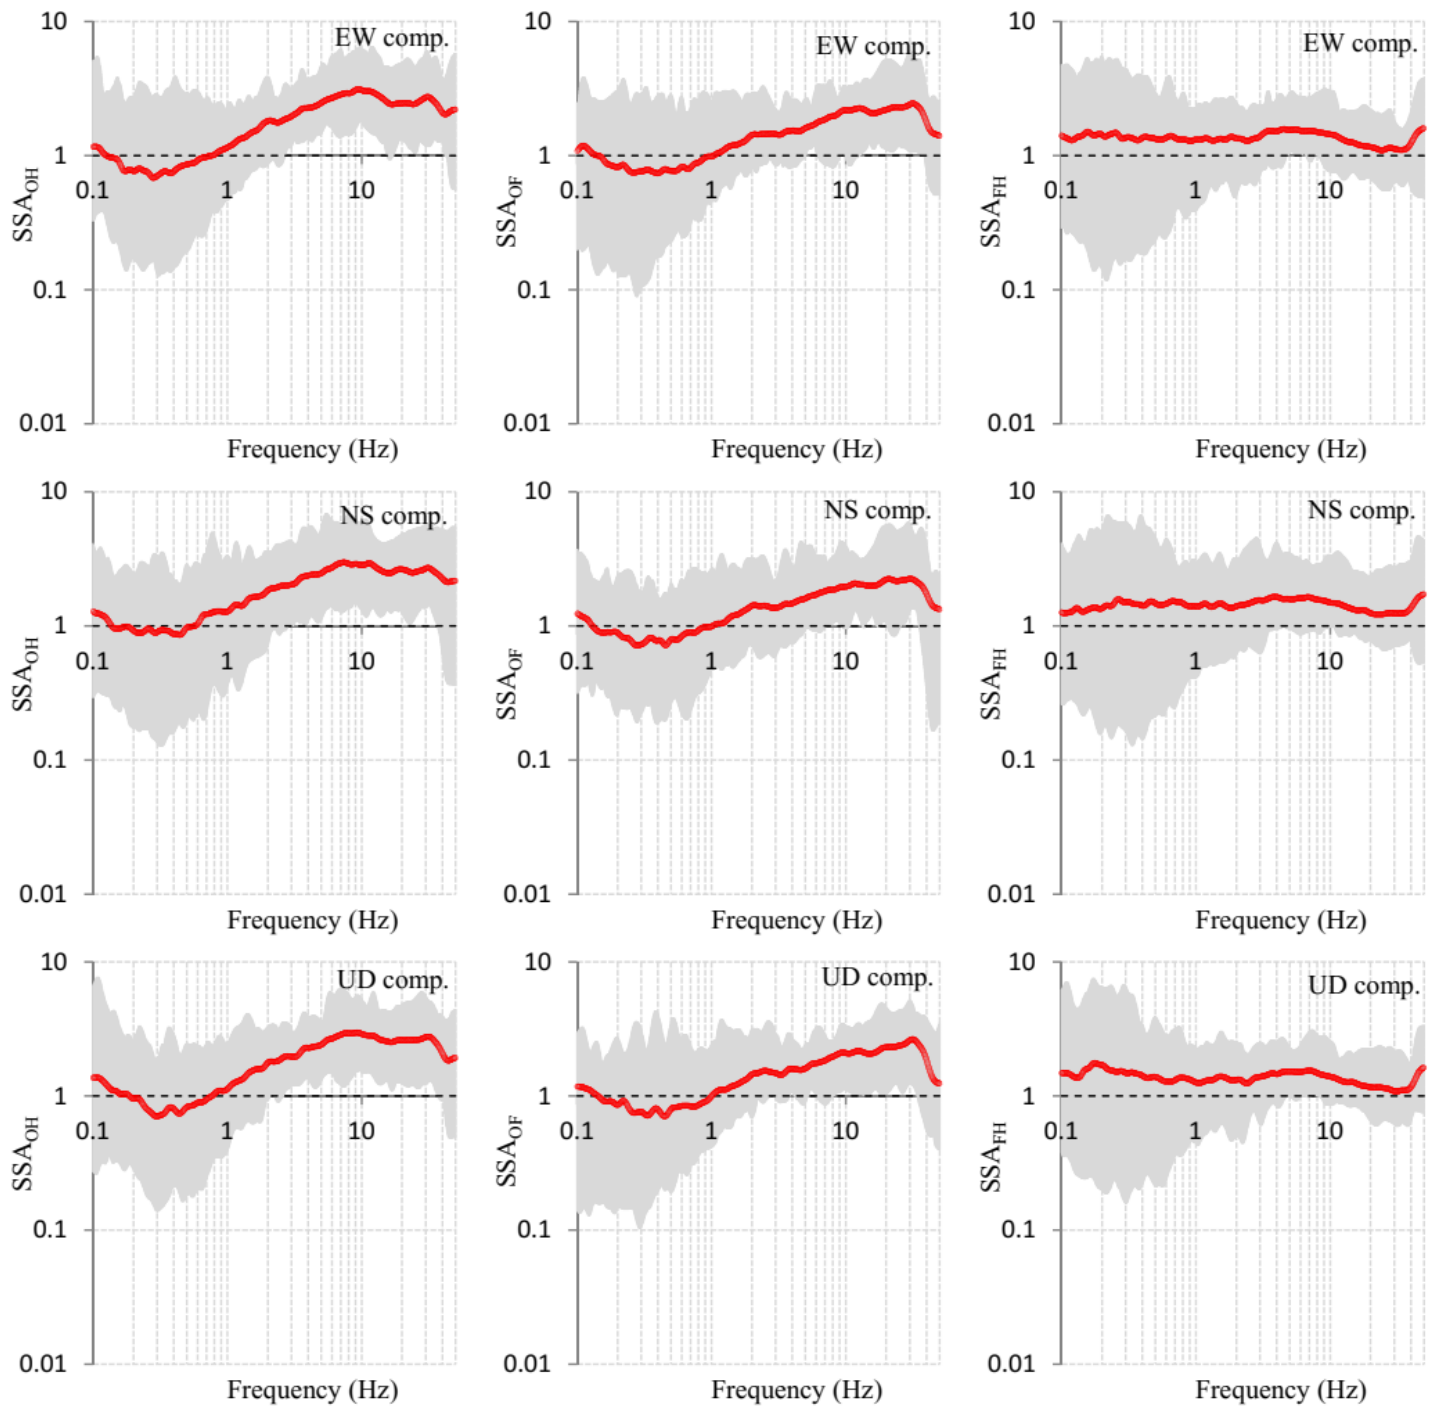

Figure S13: The estimated average SSAs (red) with their minimum and maximum (gray), which are calculated based on equations 1, 2, and 4 for the seismic stations located on the HW block in East Hokkaido study area.



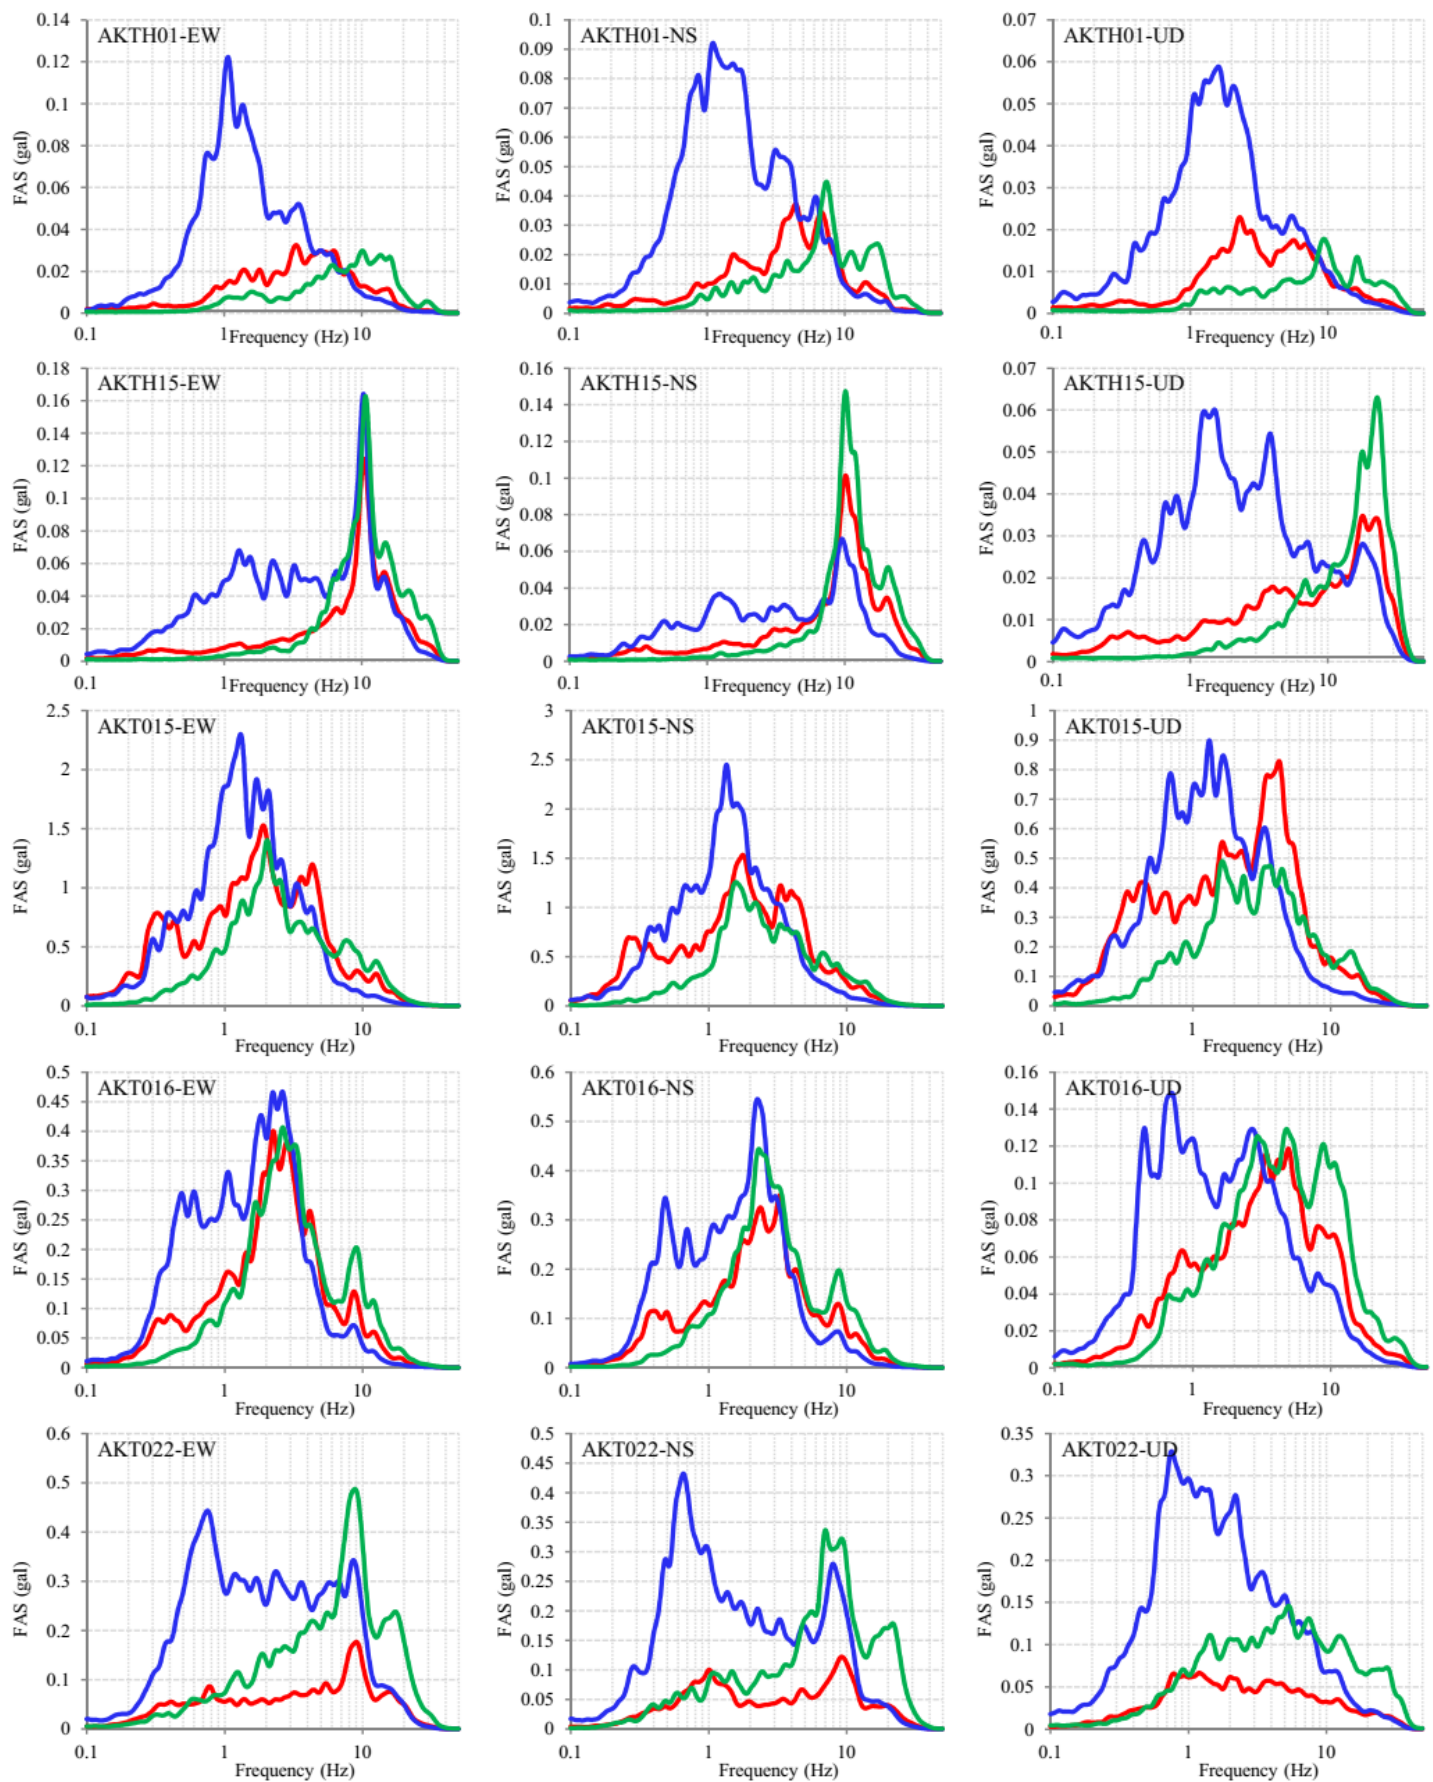

Figure S14: FASs at seismic stations located on 1.FW block in Akita-Iwate study area due to recorded El.FWs (green), EFZs (red), and Er.FWs (blue).

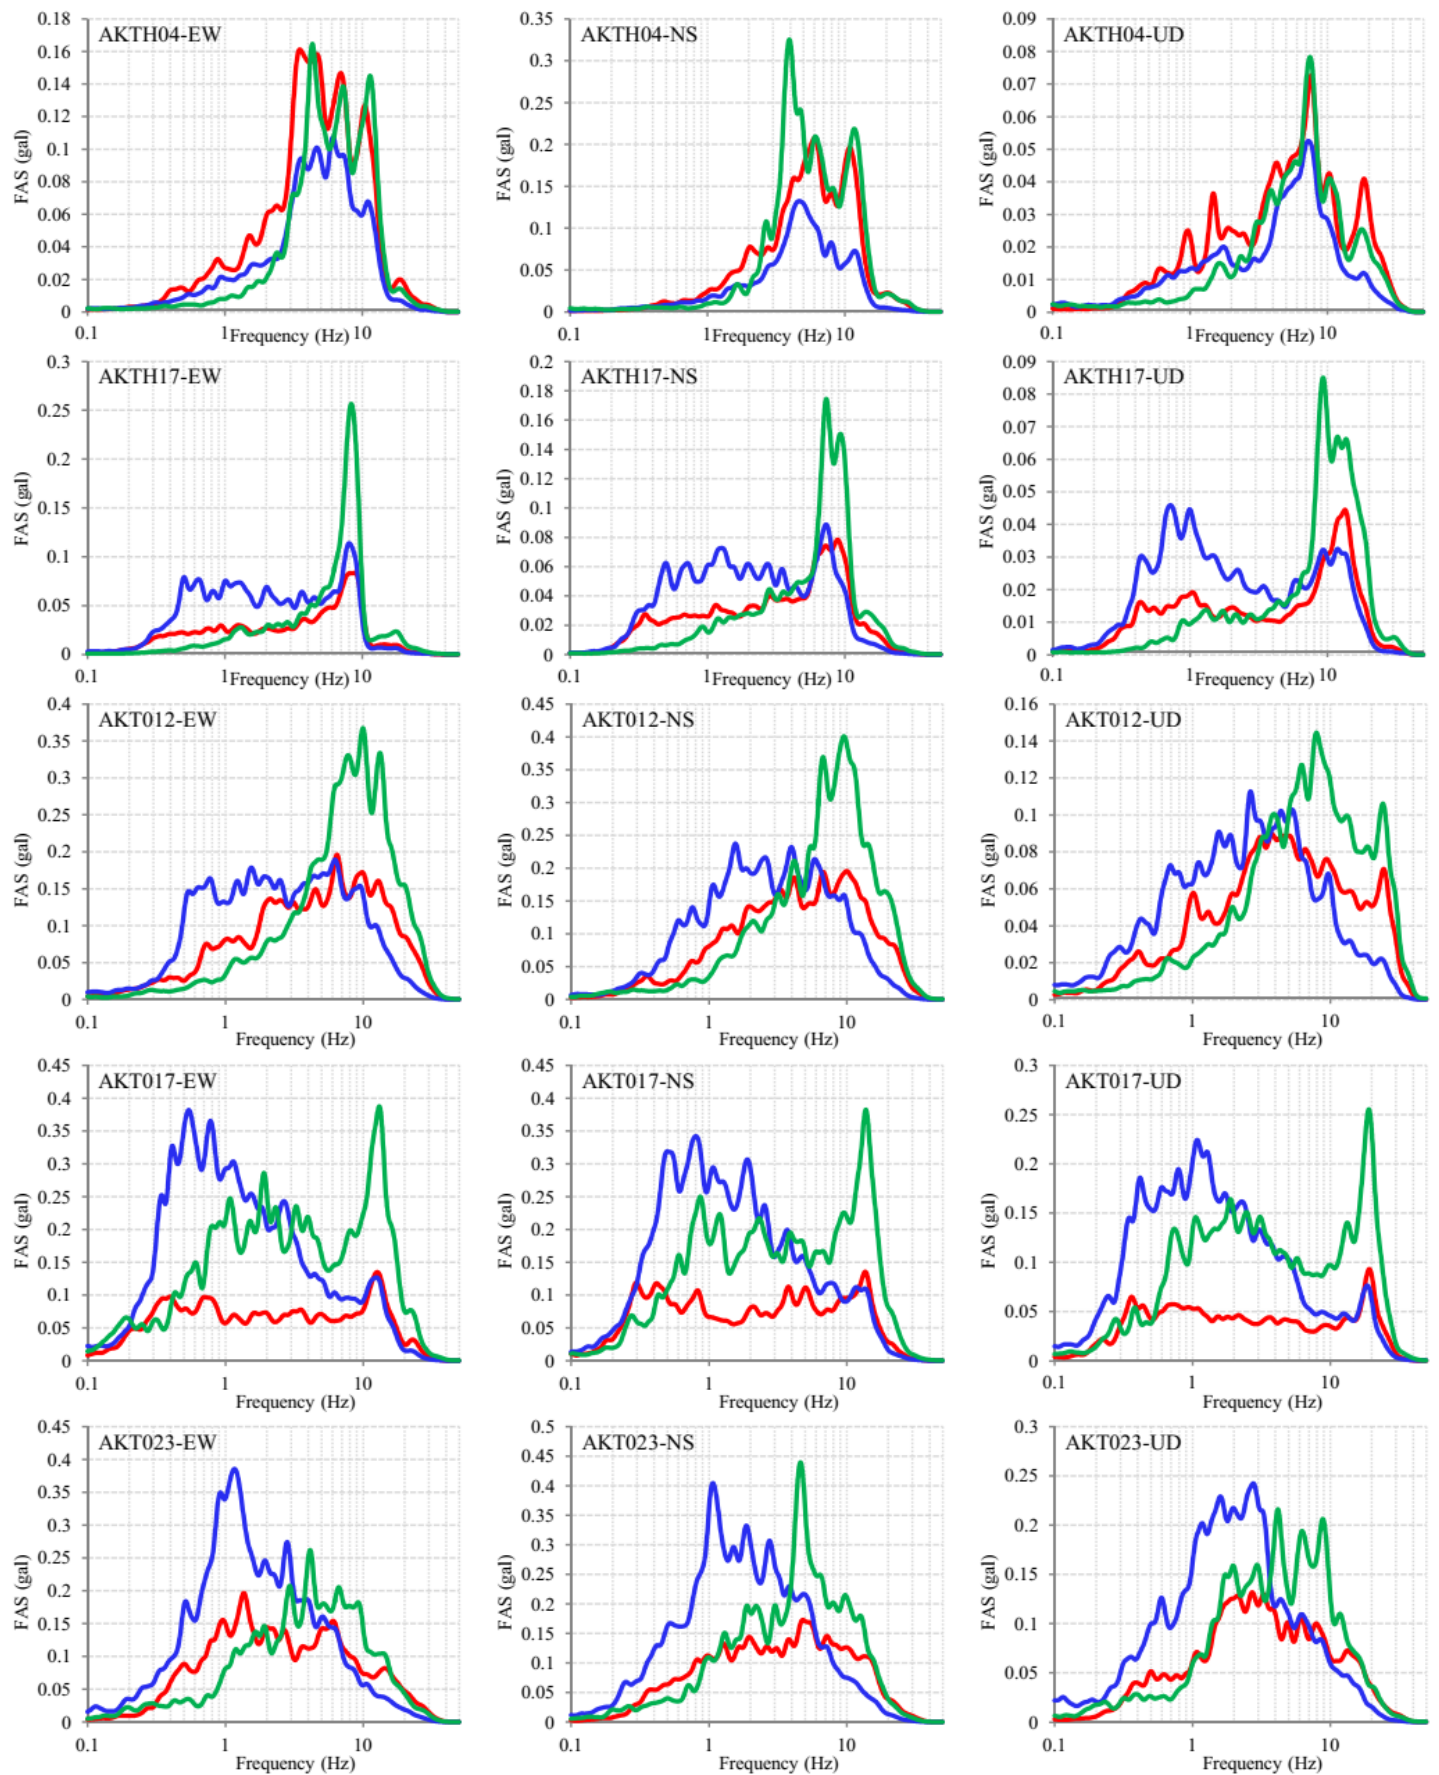

Figure S15: FASs at seismic stations located on FZ in Akita-Iwate study area due to recorded El.FWs (green), EFZs (red), and Er.FWs (blue).



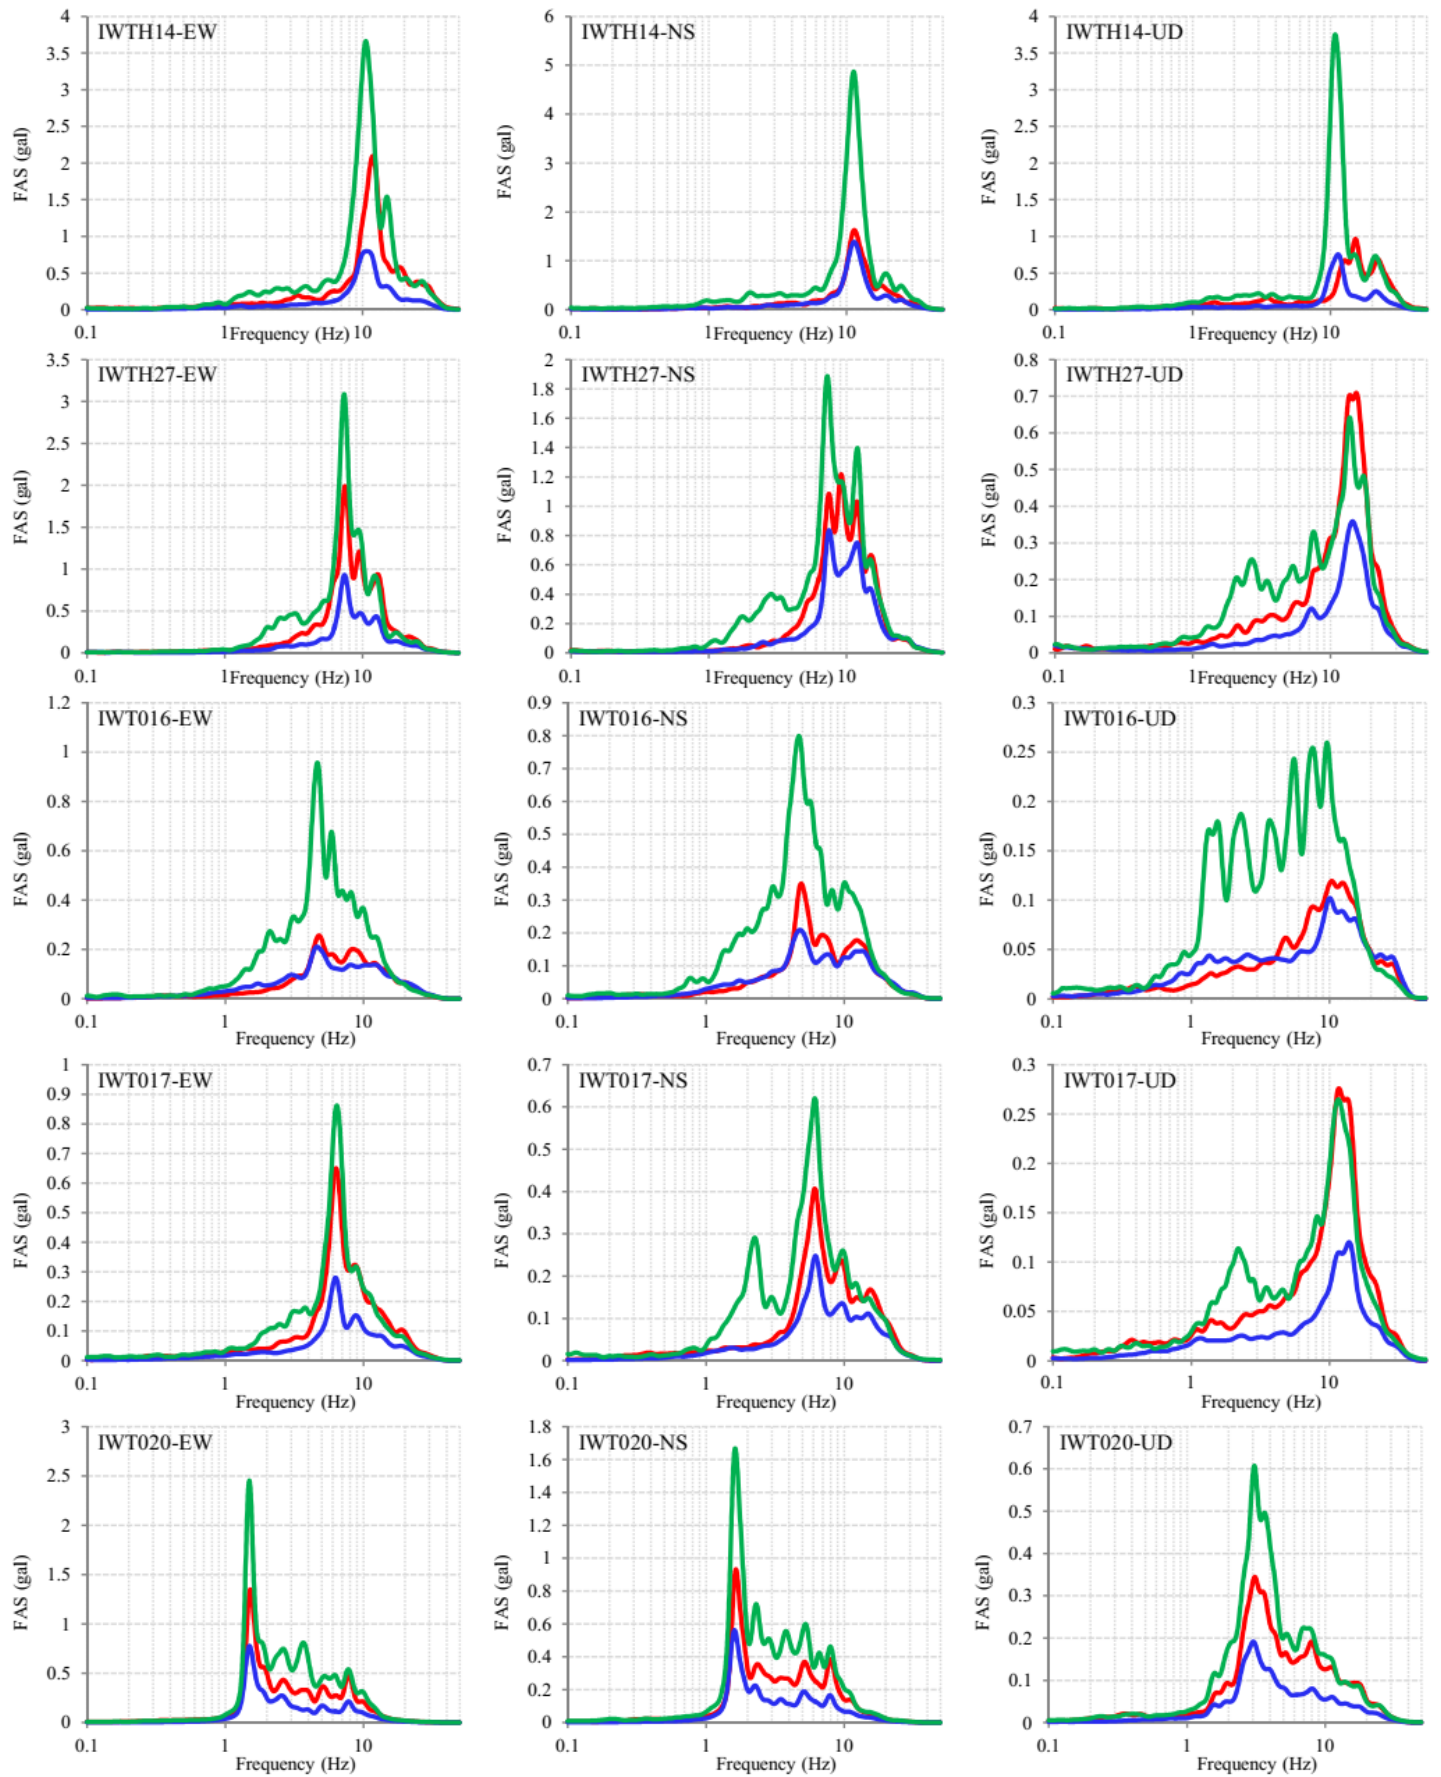

Figure S16: FASs at seismic stations located on r.FW block in Akita-Iwate study area due to recorded El.FWs (green), EFZs (red), and Er.FWs (blue).

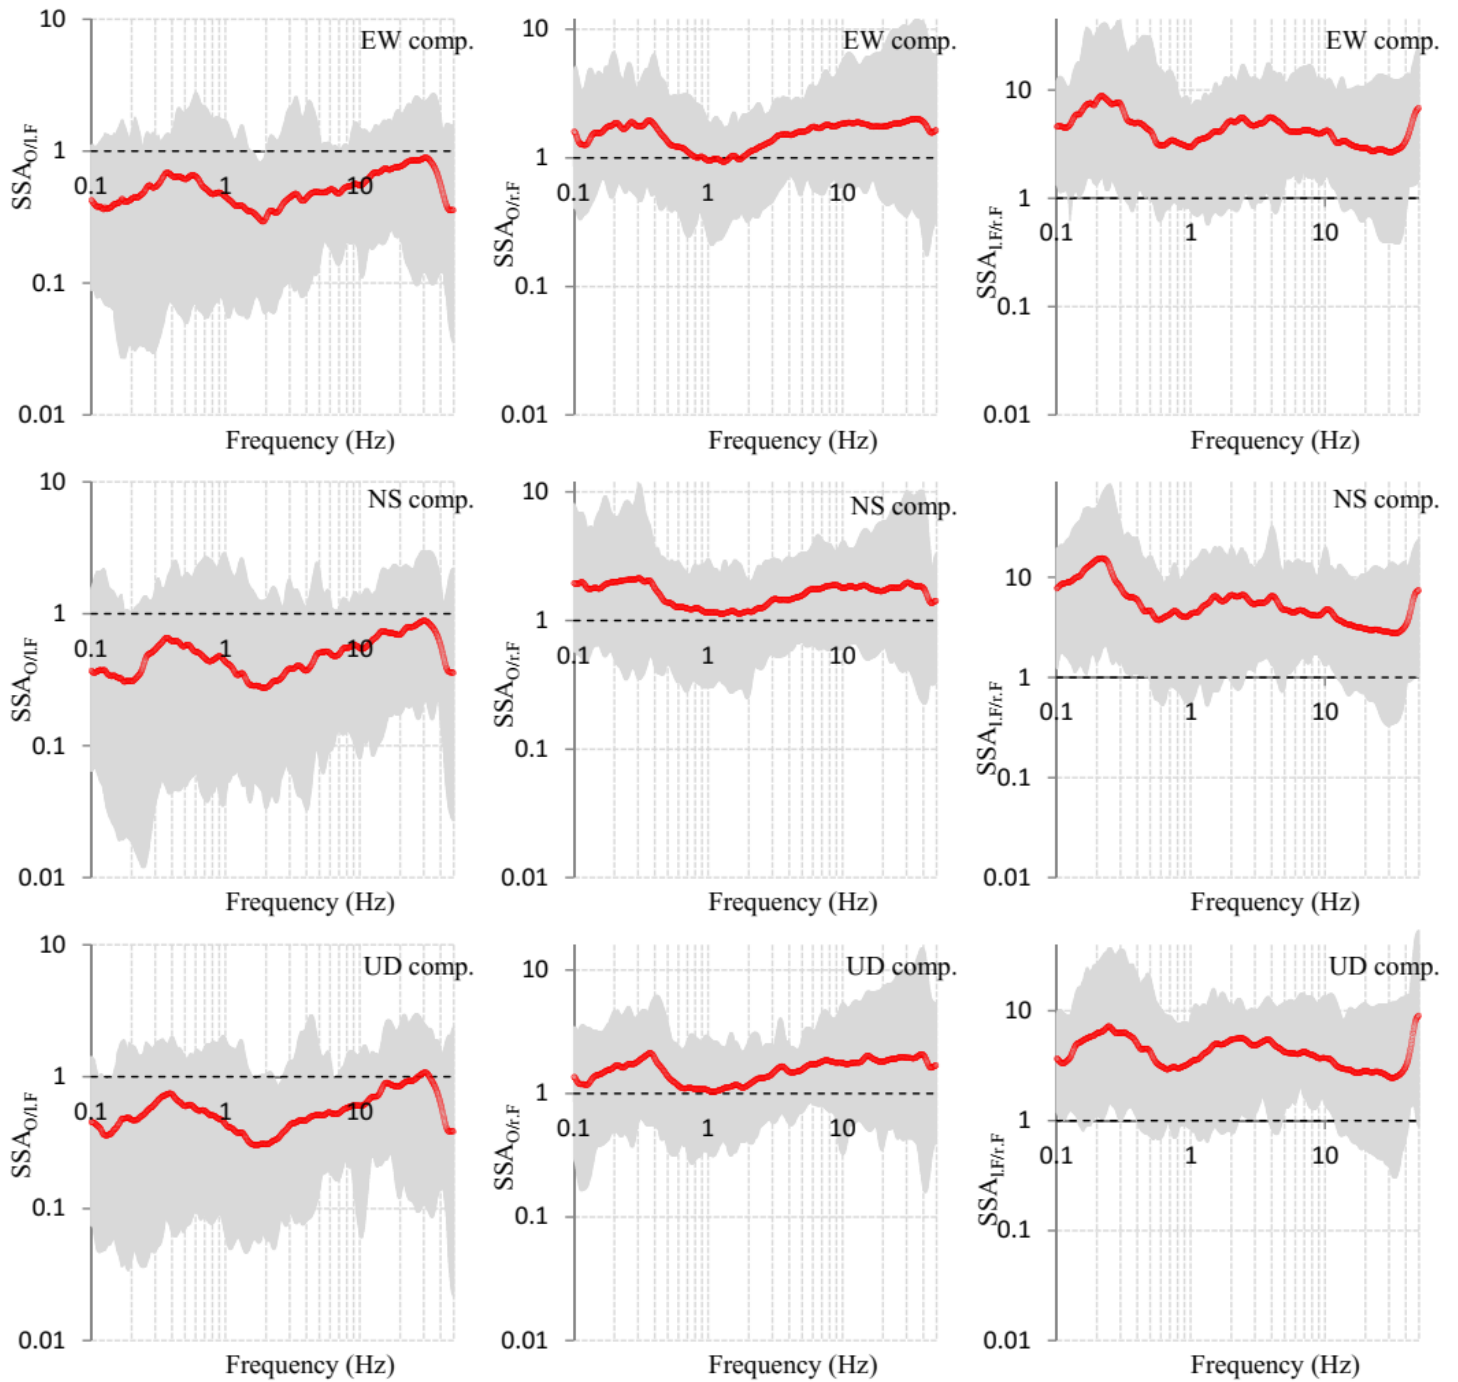

Figure S17: The estimated average SSAs (red) with their minimum and maximum (gray), which are calculated based on equations 1, 2, and 3 for the seismic stations located on the r.FW block in Akita-Iwate study area.

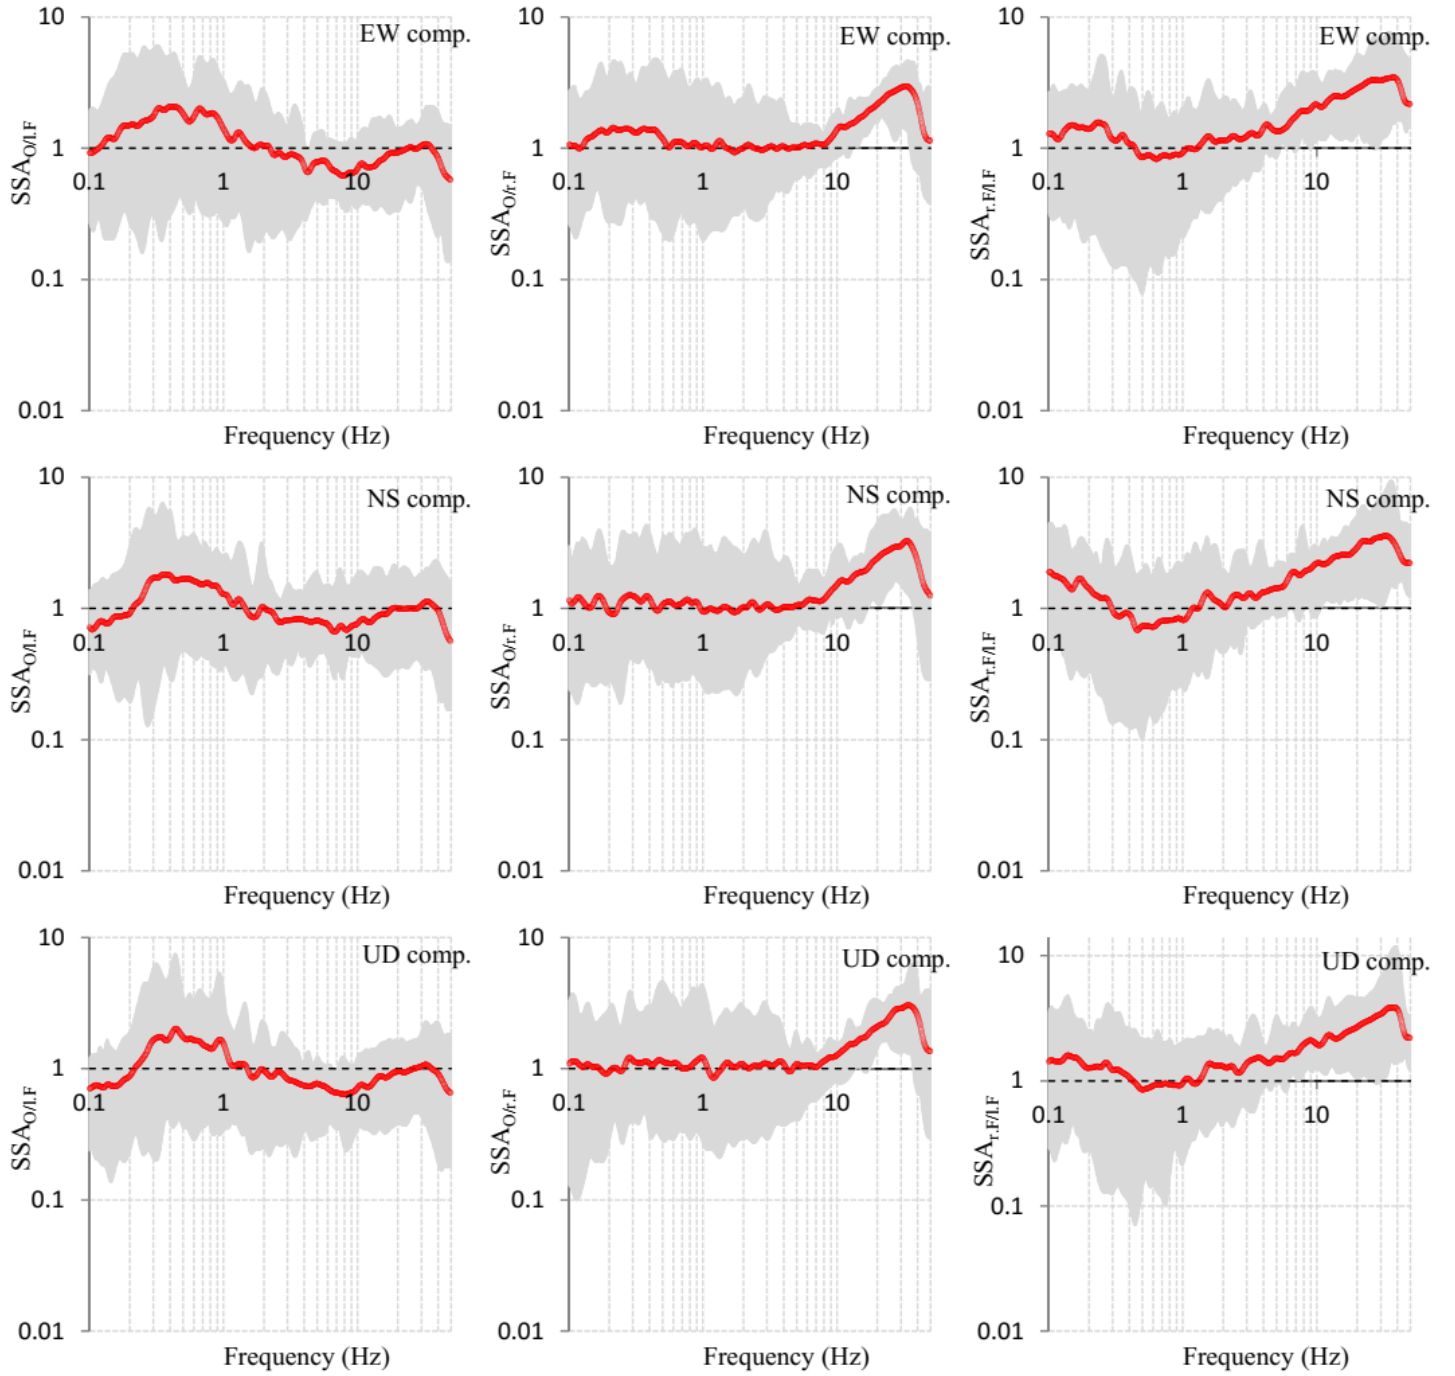

Figure S18: The estimated average SSAs (red) with their minimum and maximum (gray), which are calculated based on equations 1, 2, and 4 for the seismic stations located on the FZ in Akita-Iwate study area.

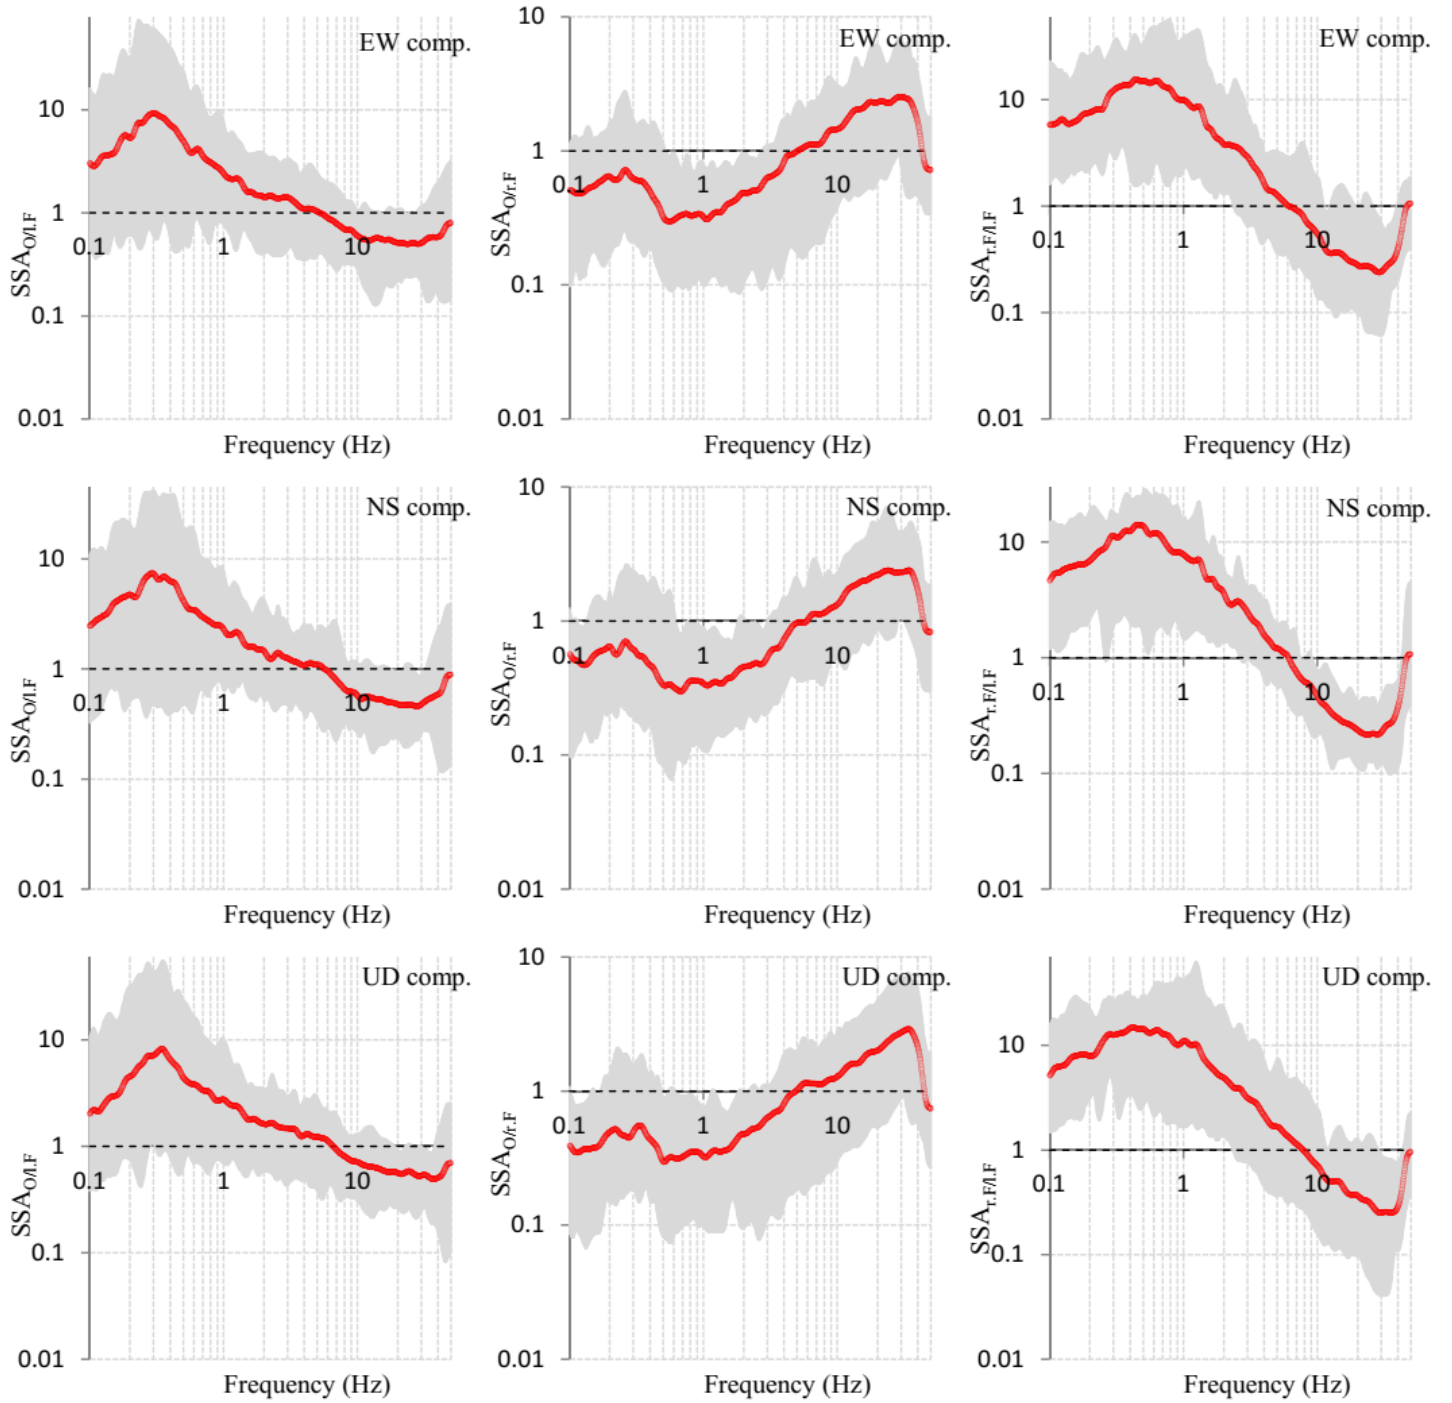

Figure S19: The estimated average SSAs (red) with their minimum and maximum (gray), which are calculated based on equations 1, 2, and 4 for the seismic stations located on the I.FW block in Akita-Iwate study area.



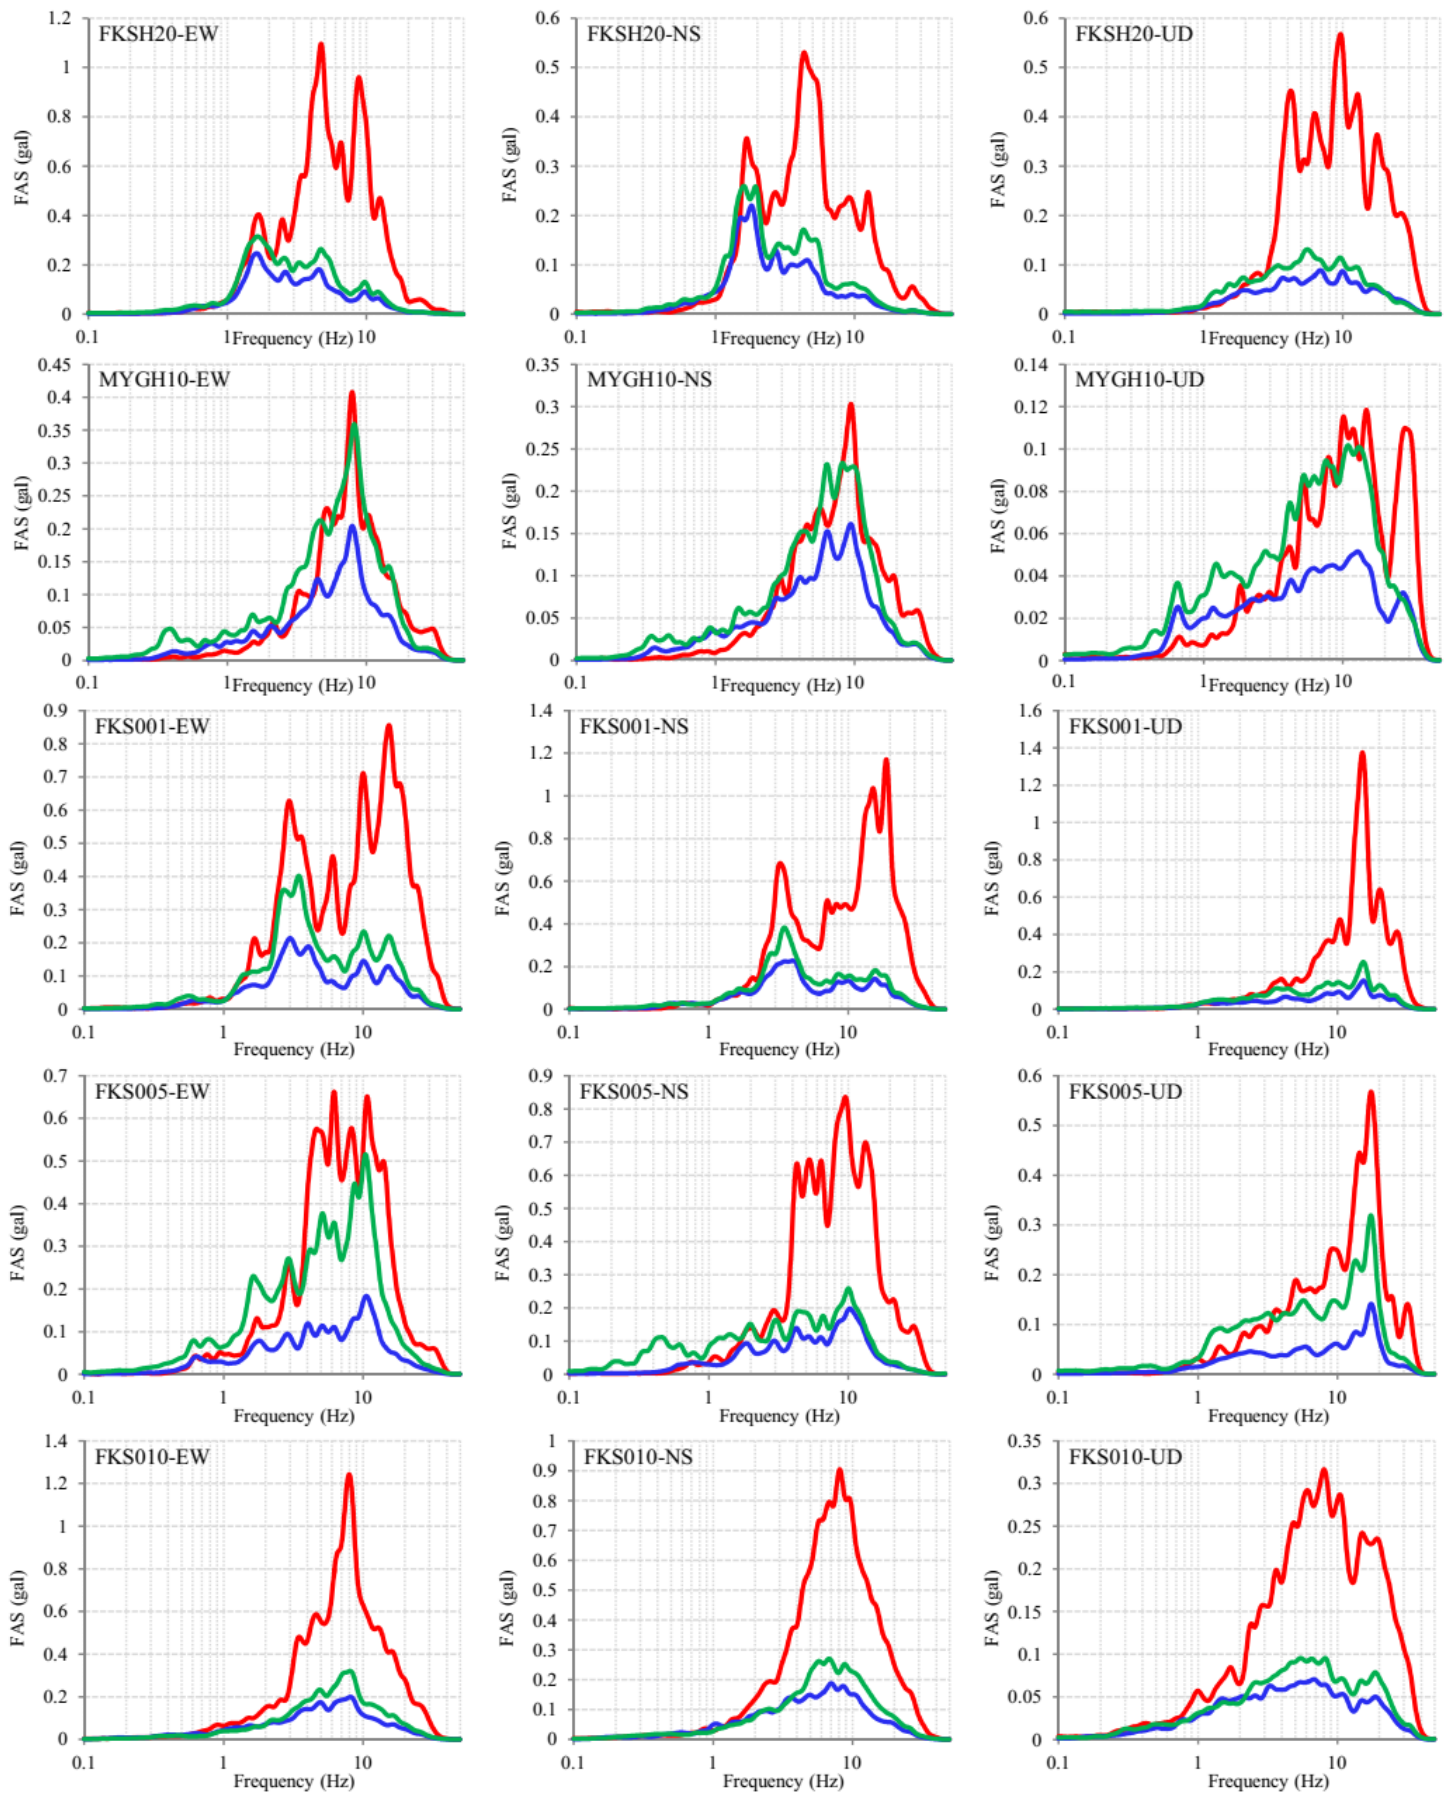

Figure S20: FASs at seismic stations located on FW block in Fukushima study area due to recorded EFWs (blue), EFZs (red), and EHWs (green).

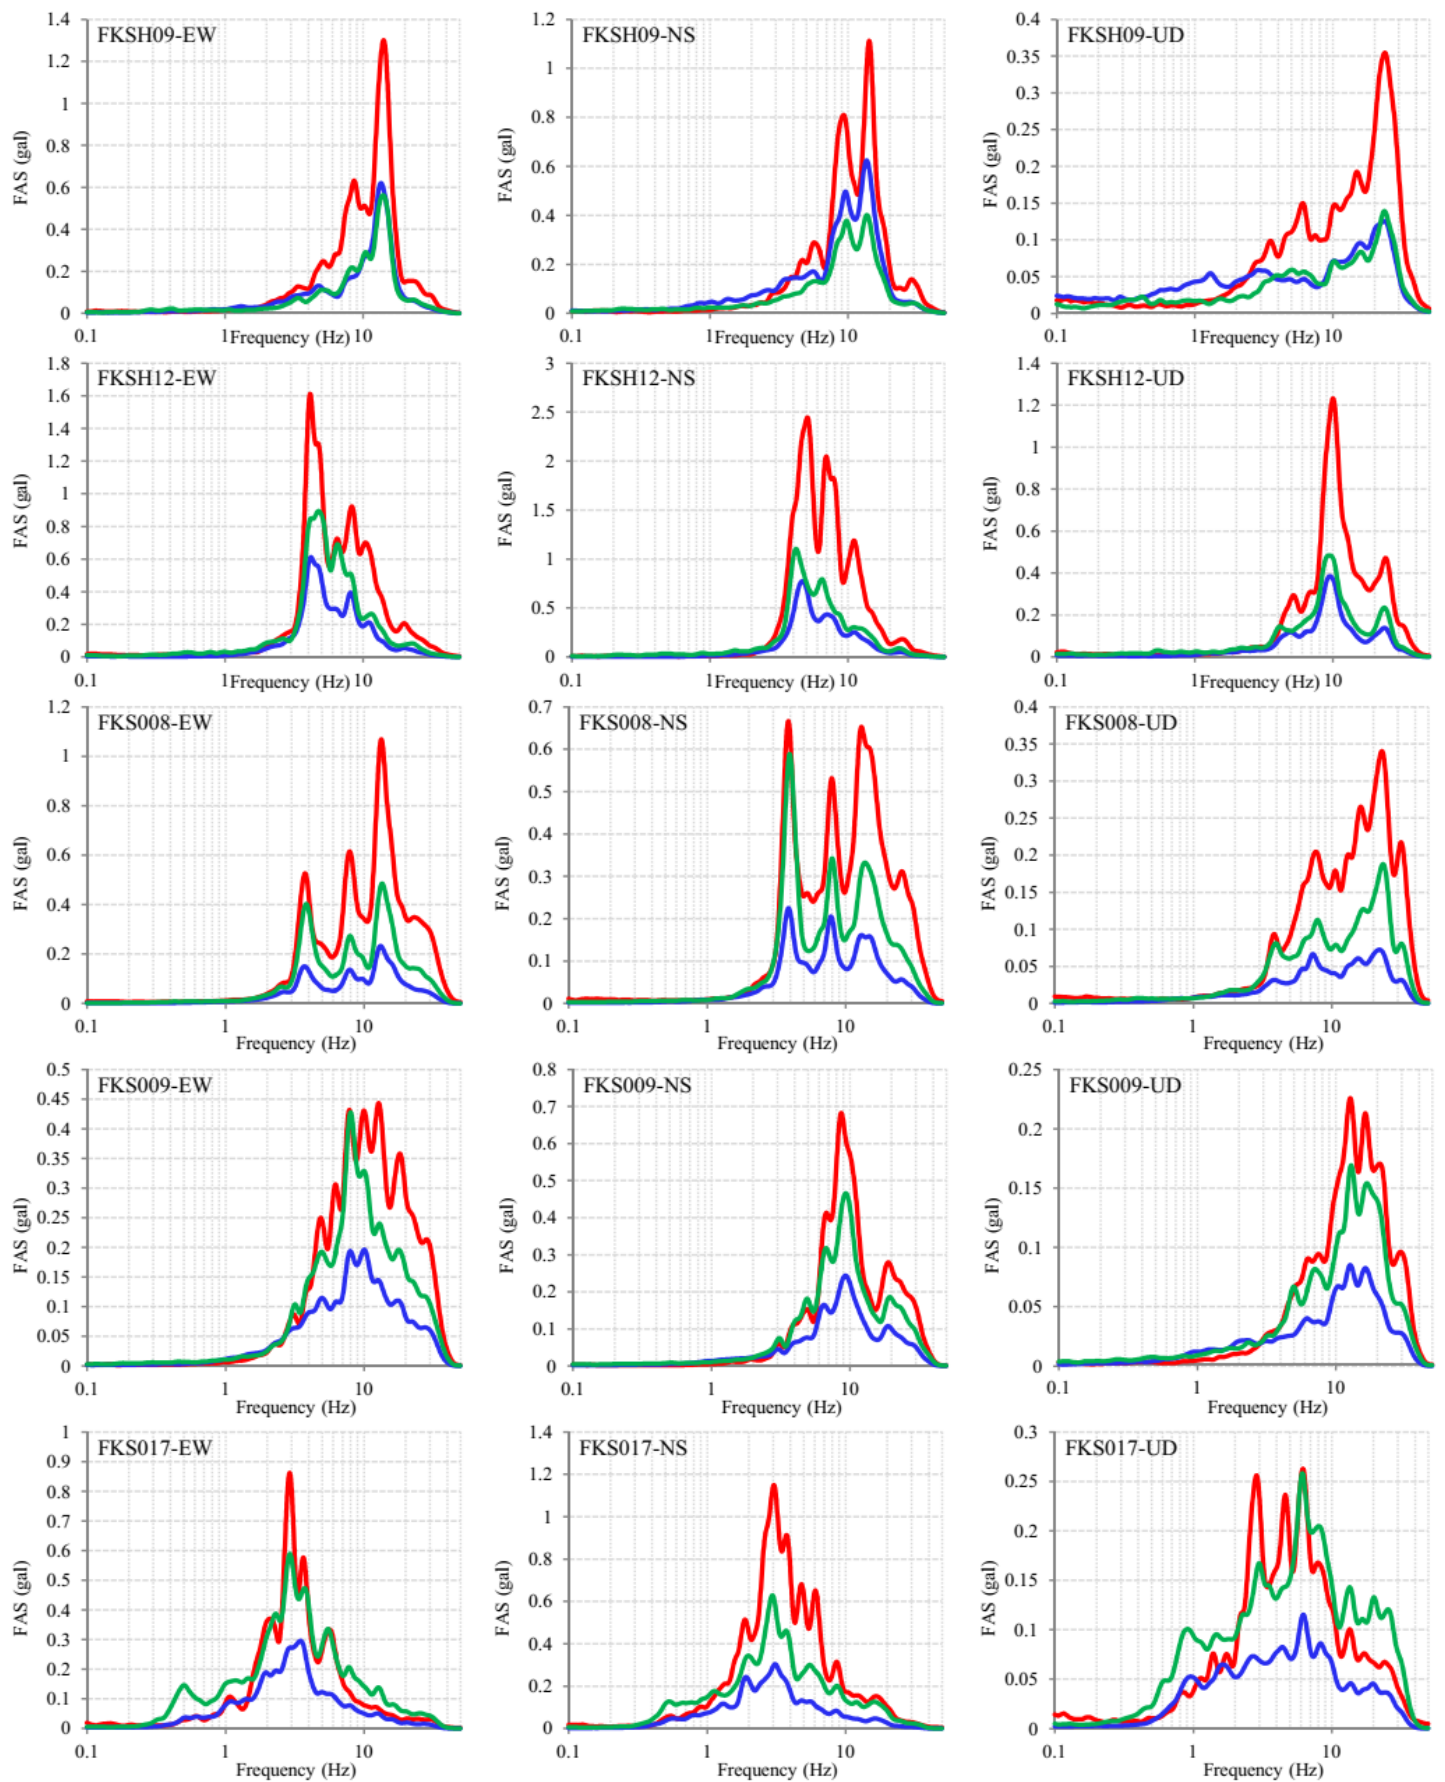

Figure S21: FASs at seismic stations located on HW block in Fukushima study area due to recorded EFWs (blue), EFZs (red), and EHWs (green).

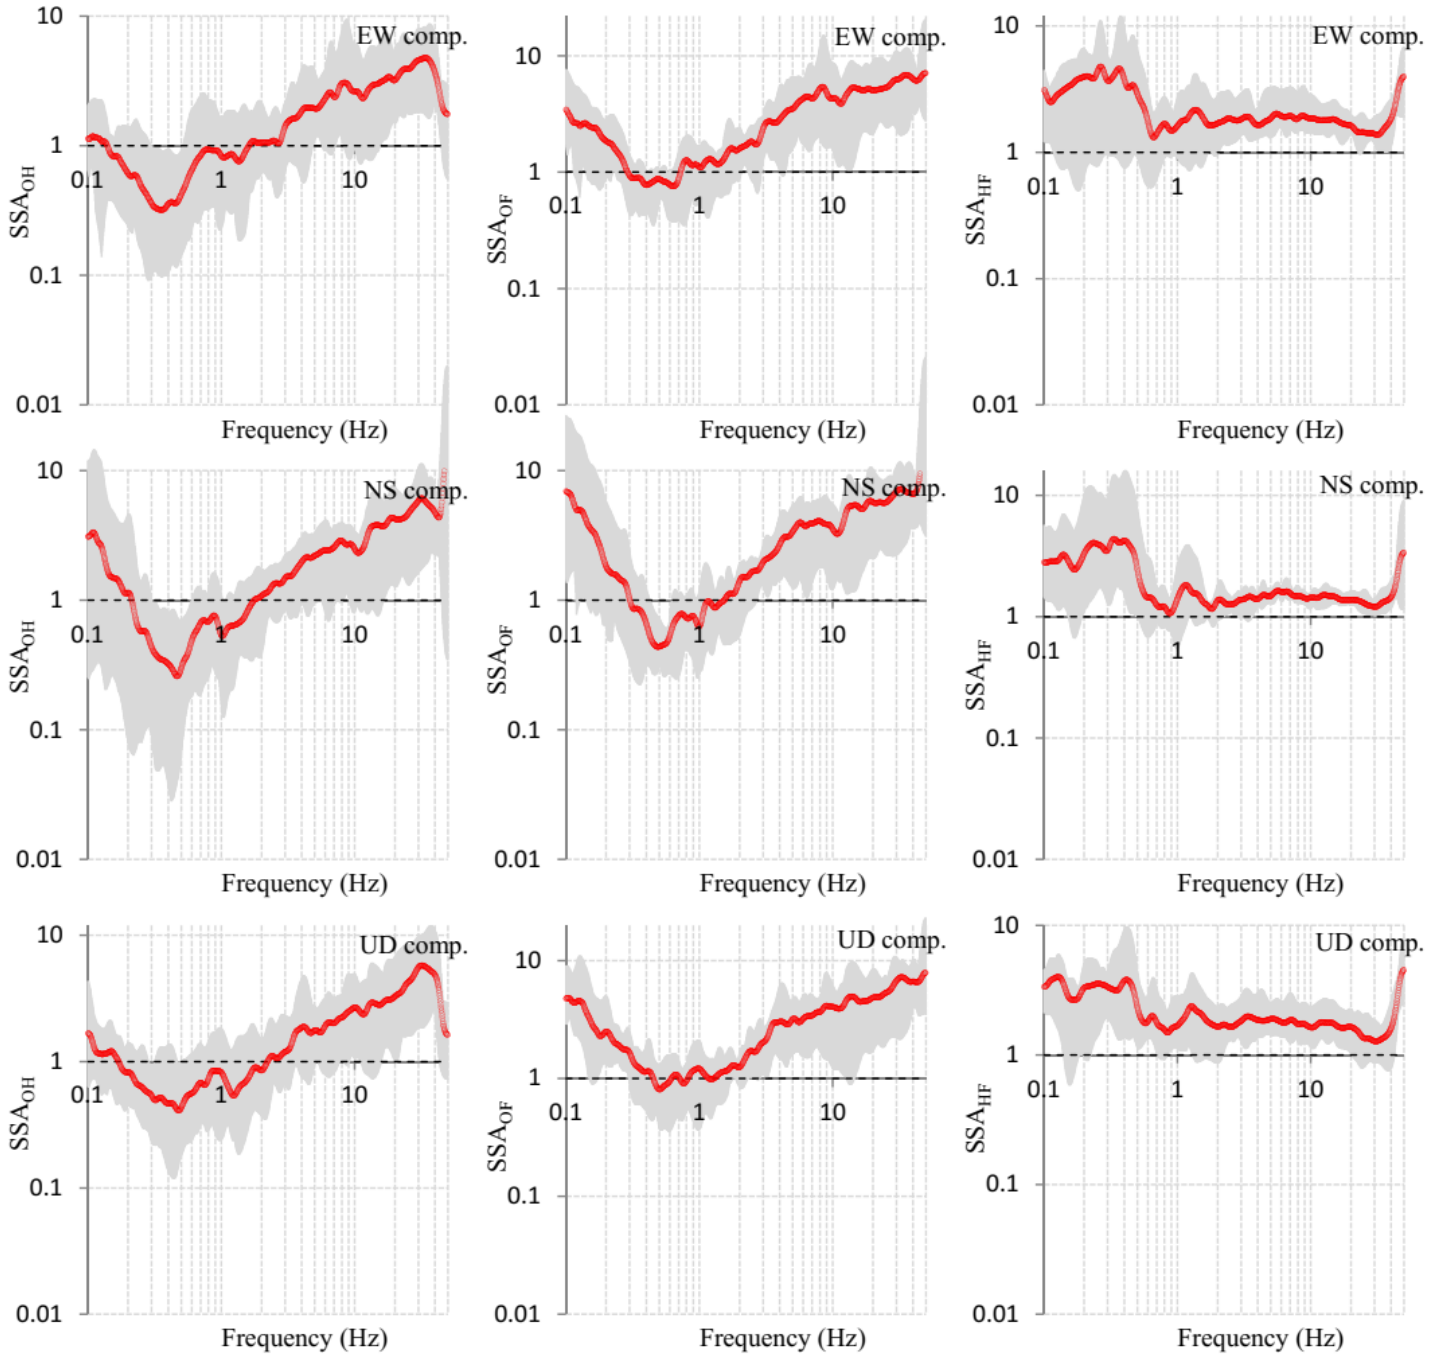

Figure S22: The estimated average SSAs (red) with their minimum and maximum (gray), which are calculated based on equations 1, 2, and 3 for the seismic stations located on the FW block in Fukushima study area.



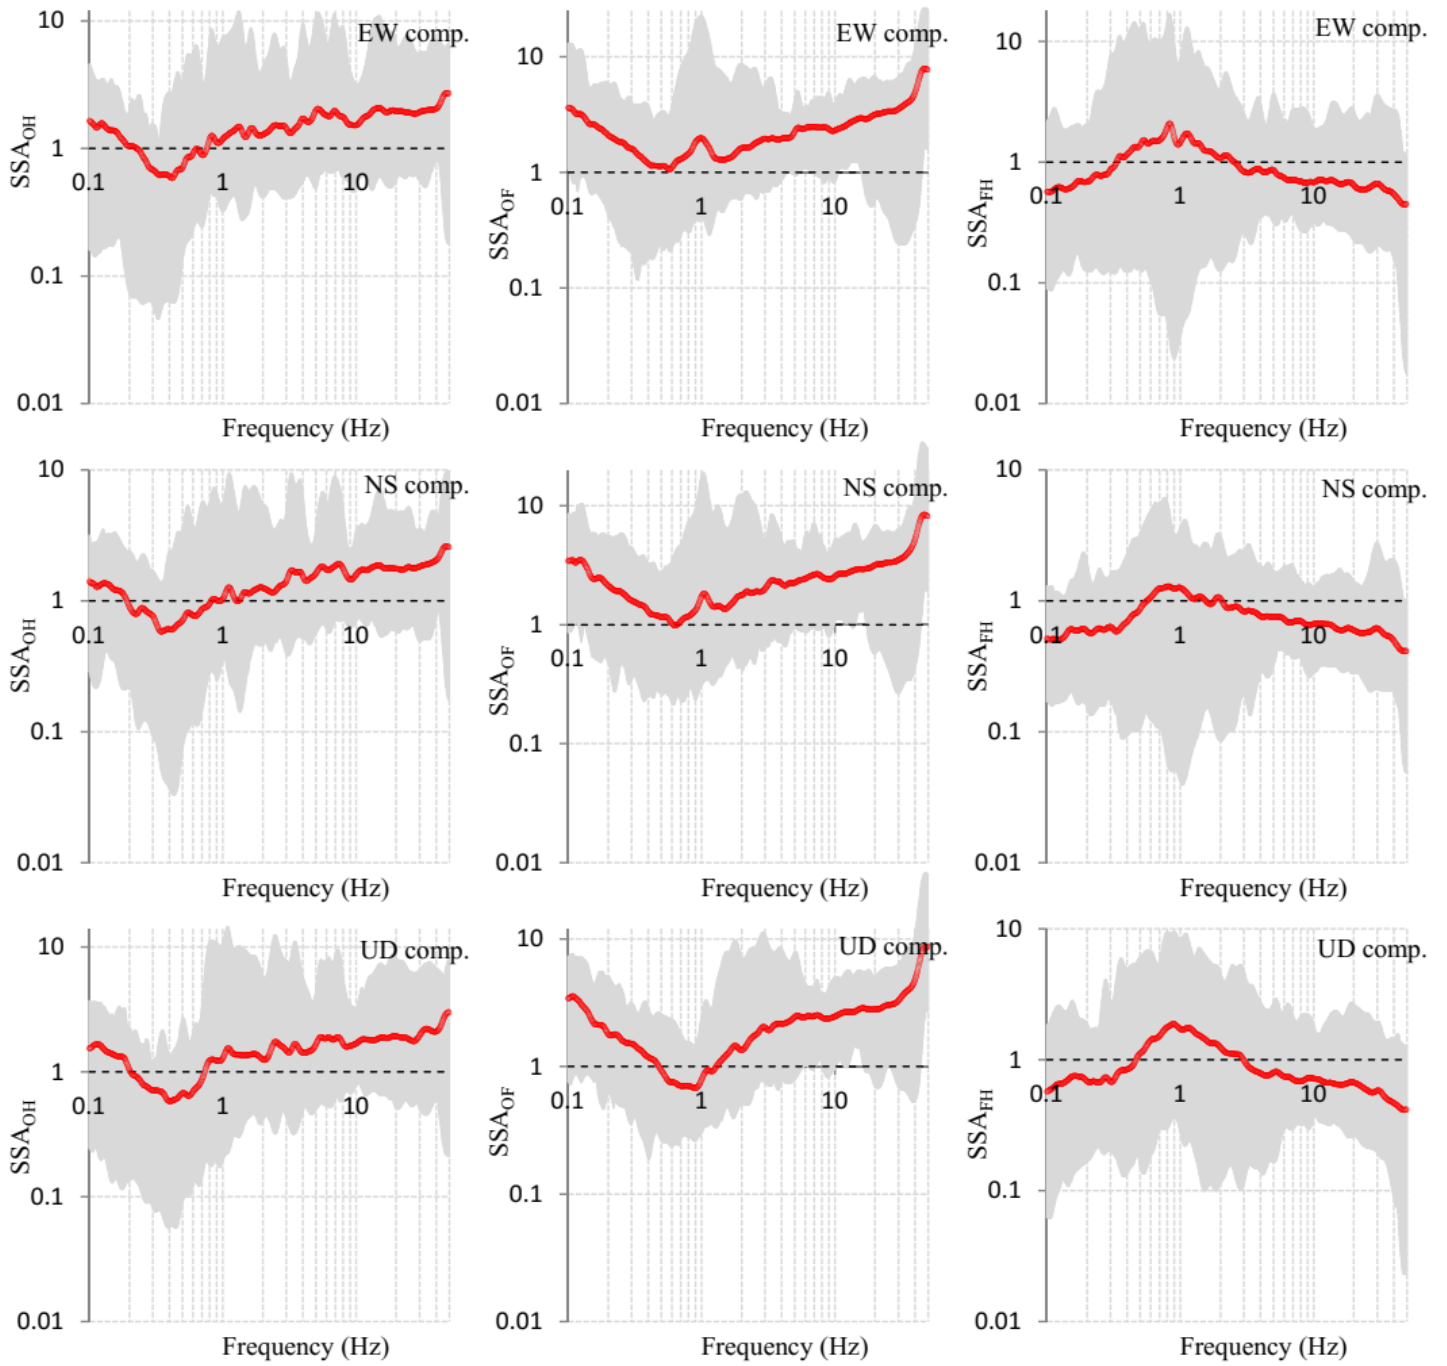

Figure S23: The estimated average SSAs (red) with their minimum and maximum (gray), which are calculated based on equations 1, 2, and 4 for the seismic stations located on the HW block in Fukushima study area.



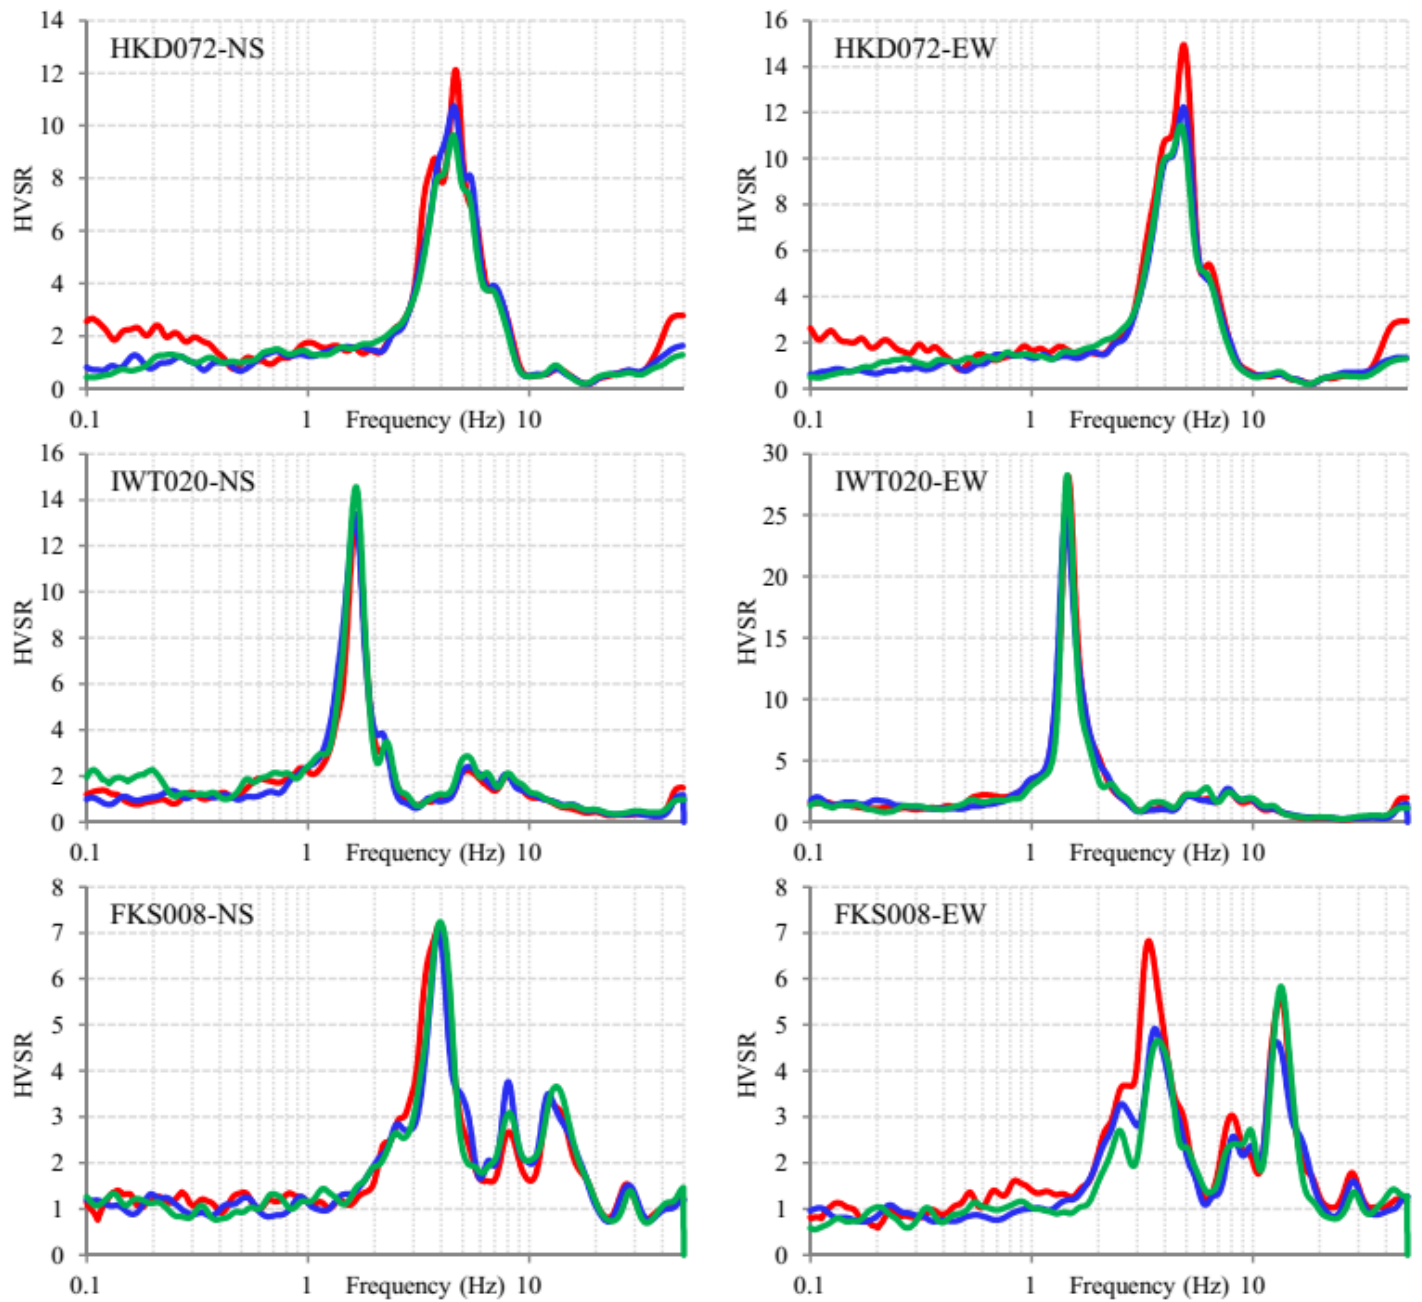

Figure S24: Examples of HVSRs at the three different study areas due to recorded EFWs or Er.FWs in Akita-Iwate area (blue), EFZs (red), EHWs or El.FWs in Akita-Iwate area (green).

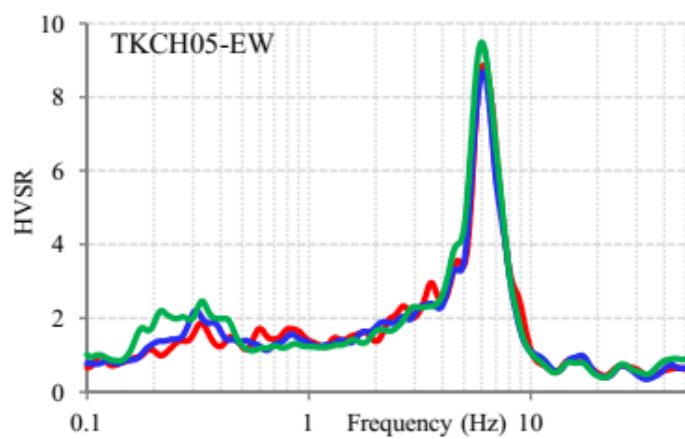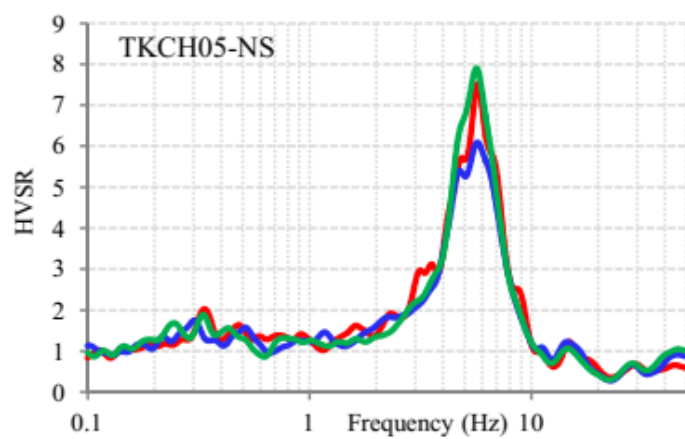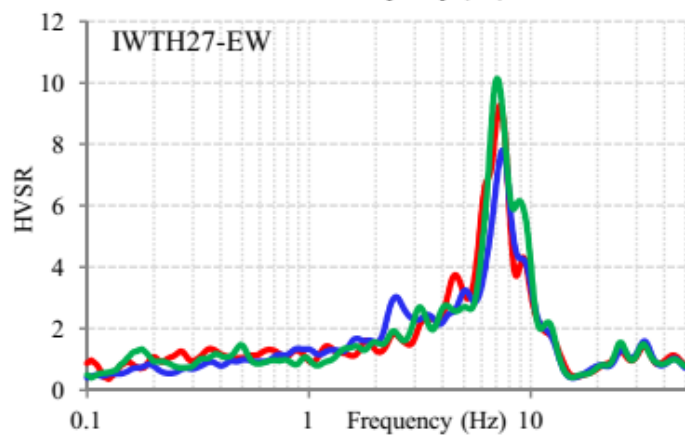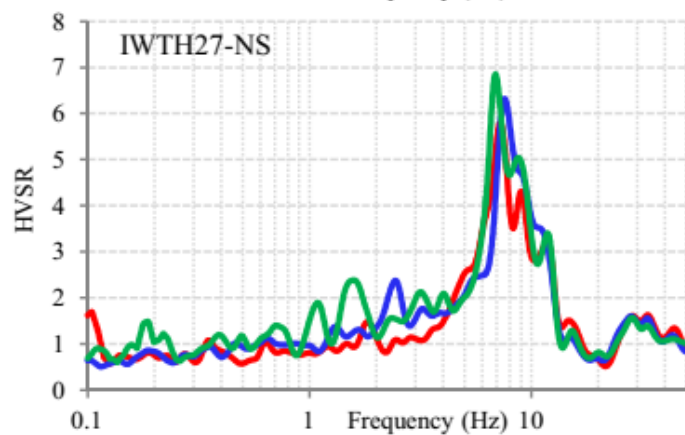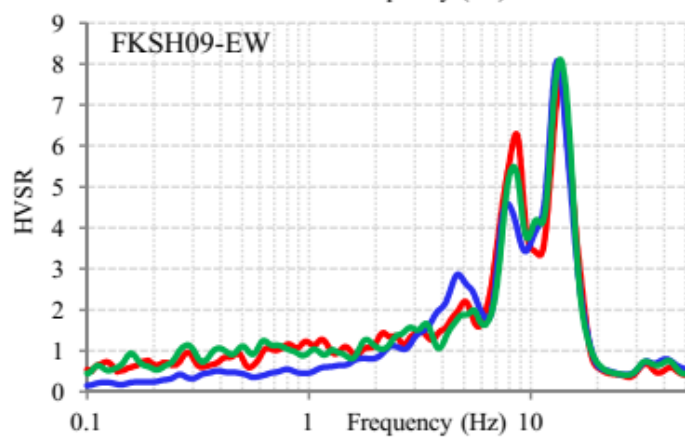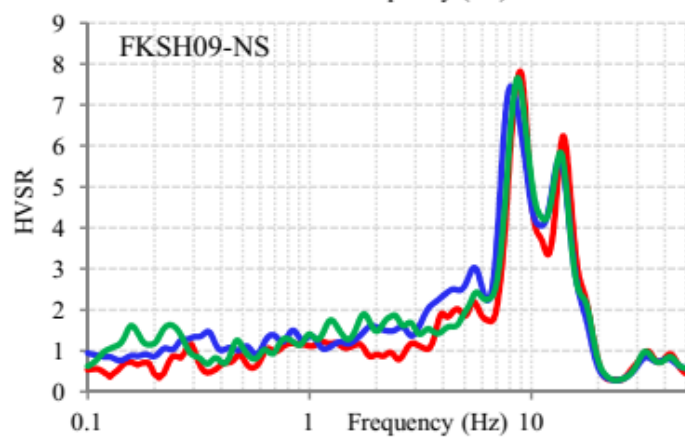

Figure S24: Continued

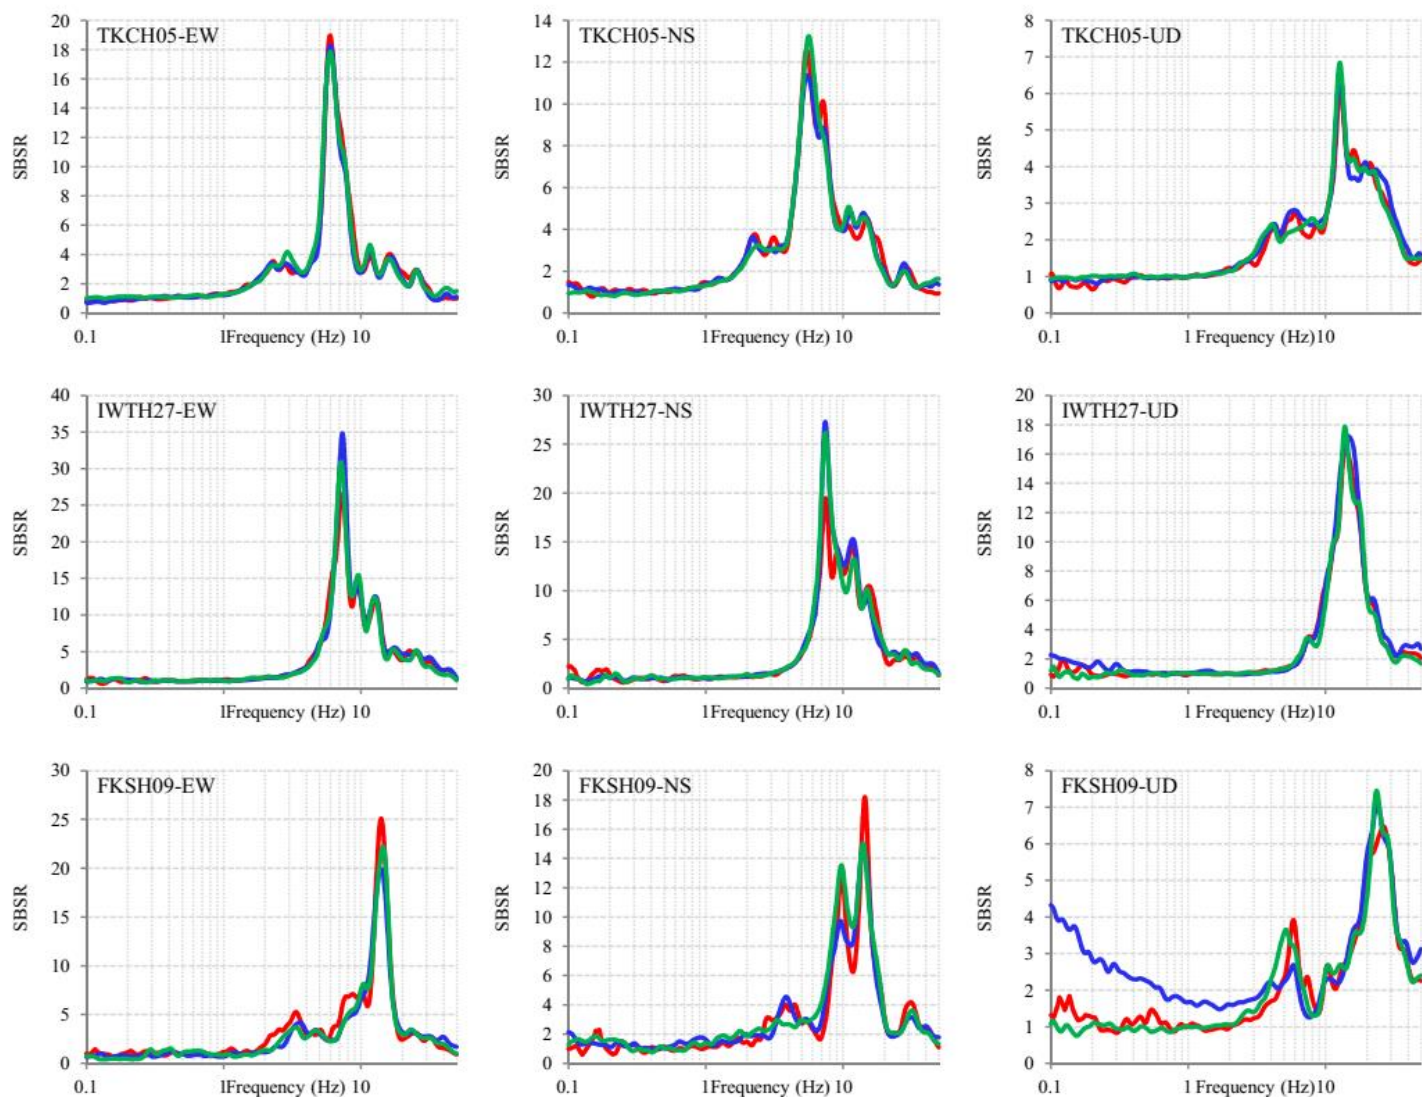

Figure S25: Examples of SBSRs at the three different study areas due to recorded EFWs or Er.FWs in Akita-Iwate area (blue), EFZs (red), EHWs or El.FWs in Akita-Iwate area (green).

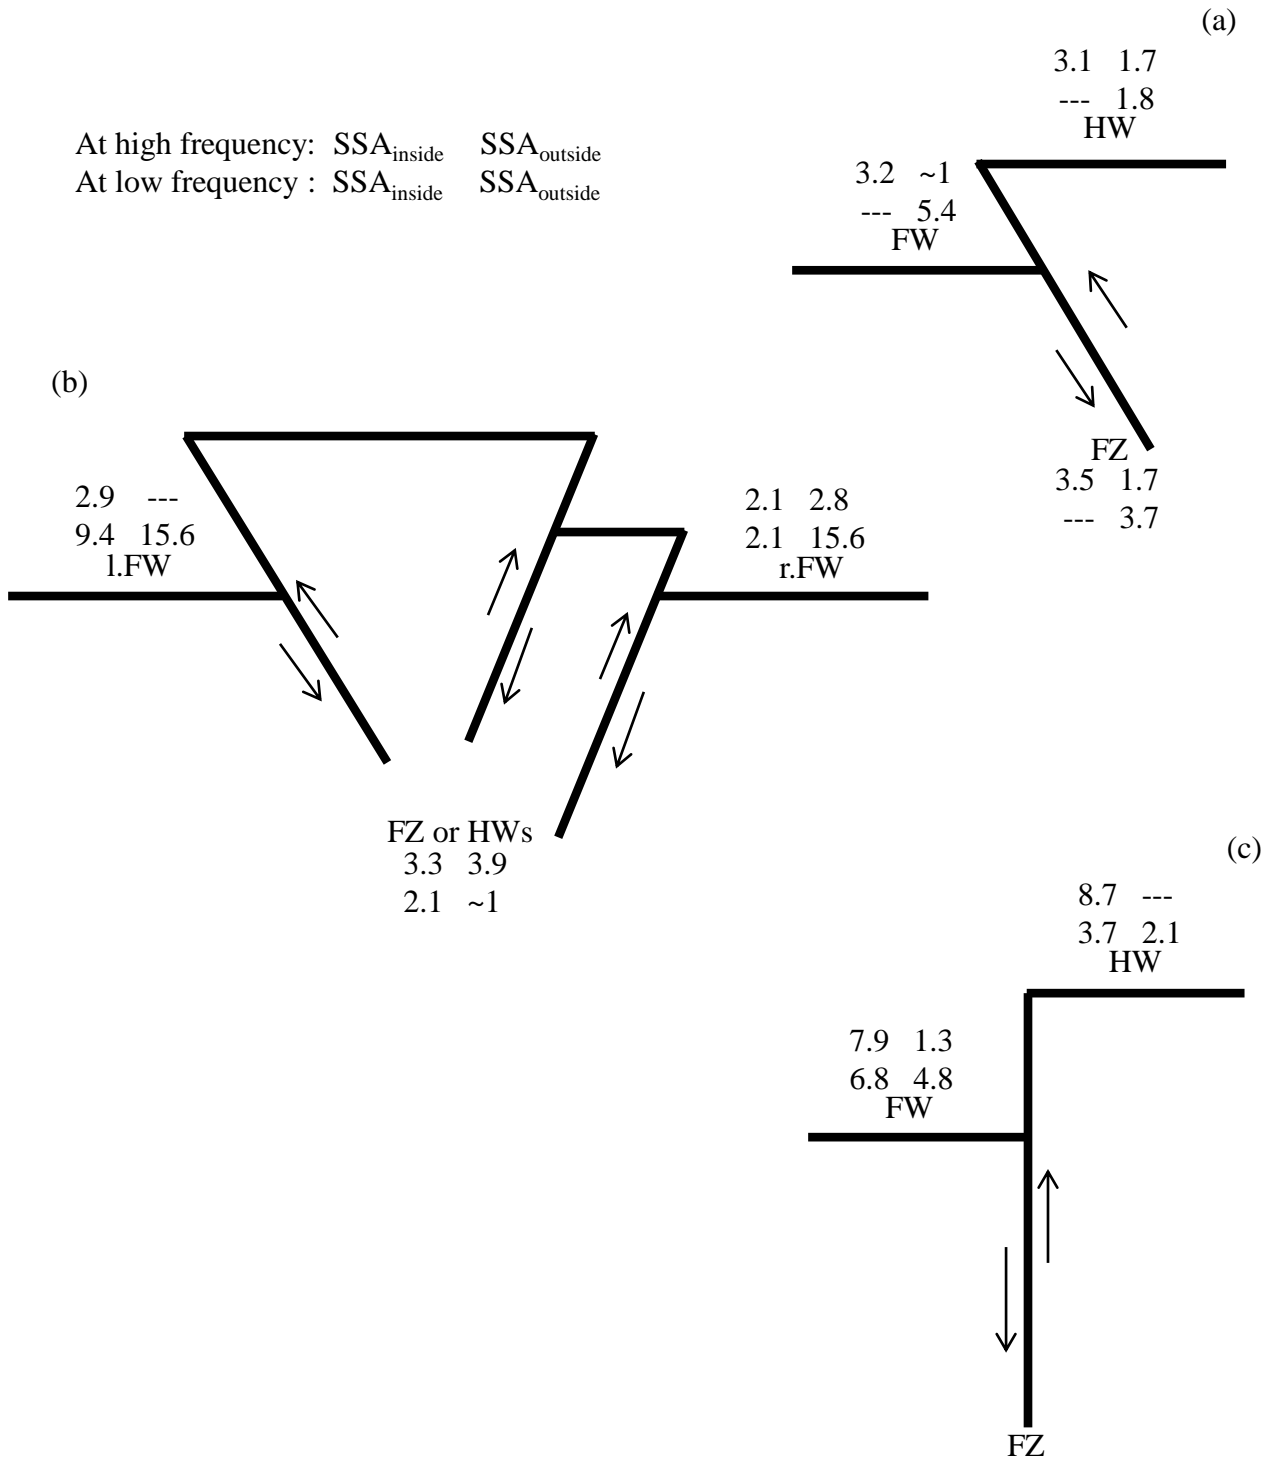

Figure S26: Schematic representations of active fault zones for the three present case studies. (a) East Hokkaido area, (b) Akita-Iwate area, and (c) Fukushima area. ( $SSA_{\text{inside}}$  and  $SSA_{\text{outside}}$  are the maximum of averages of SSA (refer to Tables 2, 3, and 4) due to sources inside and outside the active fault zones, respectively.)

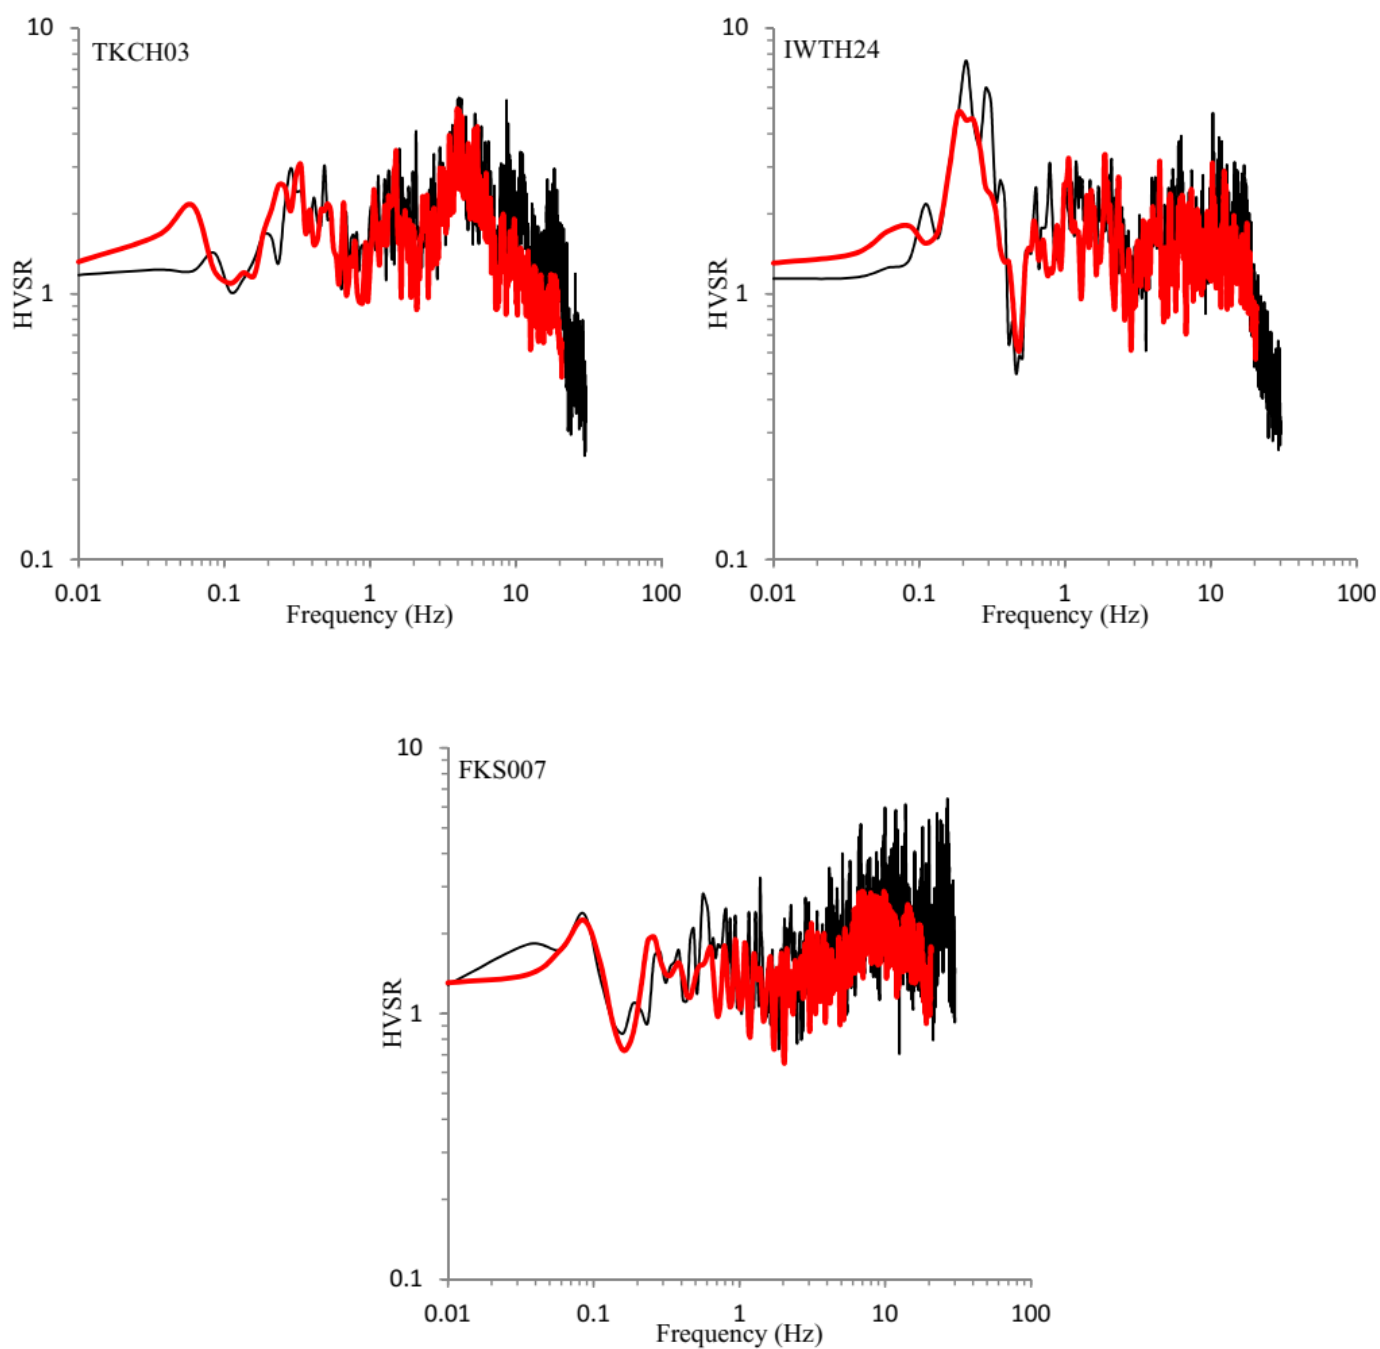

Figure S27: Examples of inverted EHVSRS (red) superimposed with observed HVSRs (black) at three seismic stations on fault zones of the present study.

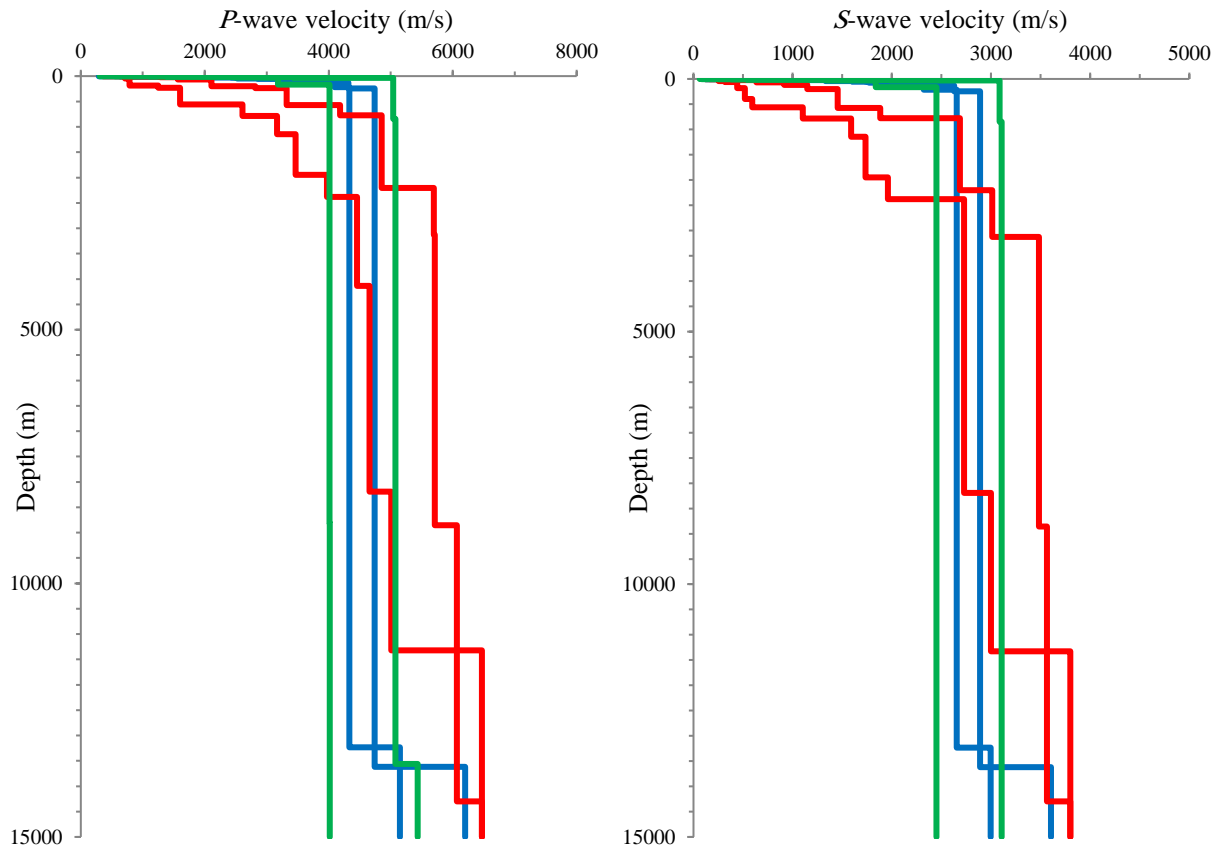

Figure S28: Inverted velocity structures in the Akita-Iwate study area beneath stations on r.FW (blue), FZ (red), and l.FW (green).

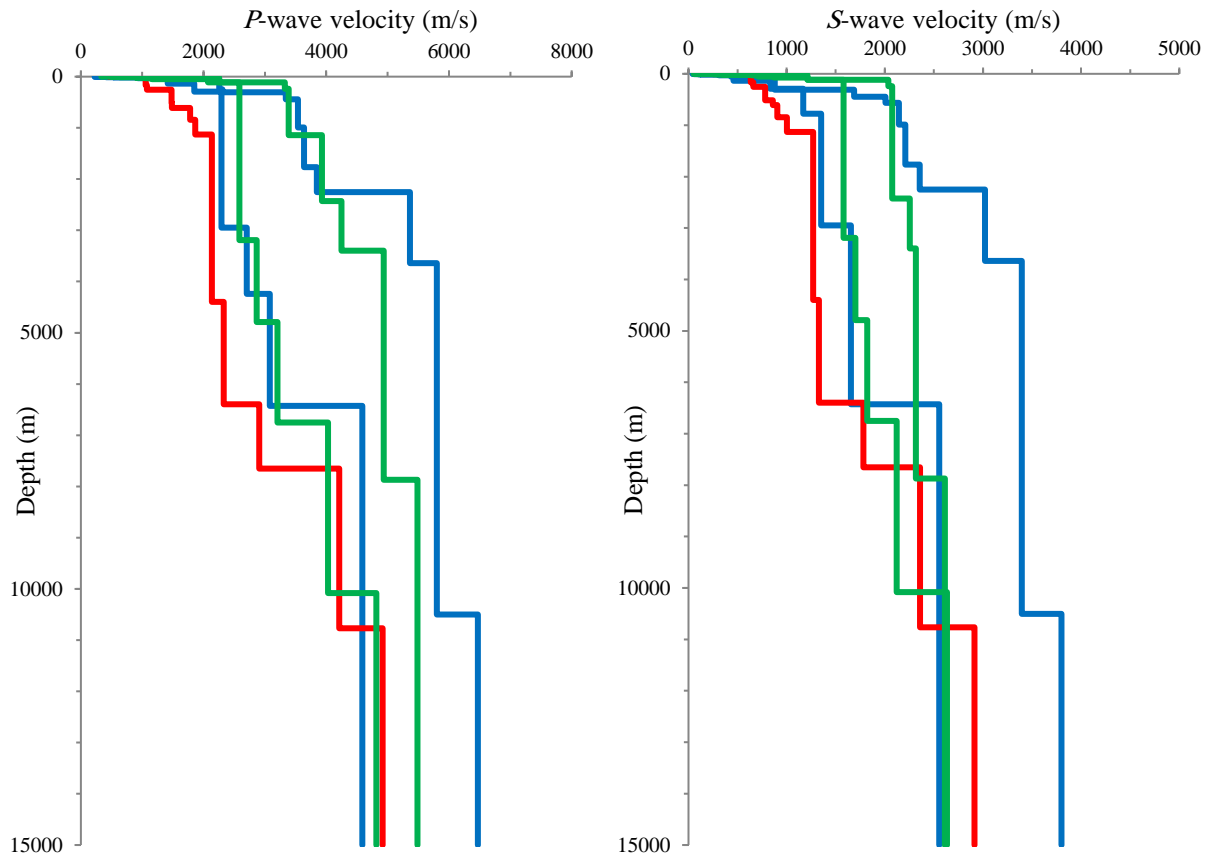

Figure S29: Inverted velocity structures in the Fukushima study area beneath stations on FW (blue), the closest to FZ (red), and HW (green).

Table S1: Characteristics of the behavioral segments of the East Hokkaido active reverse faults (AIST 2013).

| Symbol                               | <b>a</b>                                                                                                  | <b>b</b>                                                                                                  | <b>c</b>                                                                                                  | <b>d</b>                                                                                                            |
|--------------------------------------|-----------------------------------------------------------------------------------------------------------|-----------------------------------------------------------------------------------------------------------|-----------------------------------------------------------------------------------------------------------|---------------------------------------------------------------------------------------------------------------------|
| Name                                 | Shihoro                                                                                                   | Otofuke                                                                                                   | Tobetsugawa                                                                                               | Kochien                                                                                                             |
| Description                          | N-S trending east-dipping reverse fault along the eastern margin of the Tokachi Plain in central Hokkaido | N-S trending east-dipping reverse fault along the eastern margin of the Tokachi Plain in central Hokkaido | N-S trending east-dipping reverse fault along the eastern margin of the Tokachi Plain in central Hokkaido | NW-SE trending northeast-dipping reverse fault along the eastern margin of the Hidaka mountains in central Hokkaido |
| Trend                                | 10°                                                                                                       | 0°                                                                                                        | 0°                                                                                                        | 330°                                                                                                                |
| Dip                                  | 30° E                                                                                                     | 30° E                                                                                                     | 30° E                                                                                                     | 45° E                                                                                                               |
| Length                               | 62 Km                                                                                                     | 18 Km                                                                                                     | 40 Km                                                                                                     | 26 Km                                                                                                               |
| Sense of faulting                    | Reverse                                                                                                   | Reverse                                                                                                   | Reverse                                                                                                   | Reverse                                                                                                             |
| Upthrown side                        | East                                                                                                      | East                                                                                                      | East                                                                                                      | East                                                                                                                |
| Slip rate                            | 0.4 m/K years                                                                                             | 0.0 m/K years                                                                                             | 0.3 m/K years                                                                                             | 0.1 m/K years                                                                                                       |
| Slip per Event                       | 7.2 m                                                                                                     |                                                                                                           | 4.7 m                                                                                                     | 3.0 m                                                                                                               |
| Recurrence Interval                  | 18000 years                                                                                               | -----                                                                                                     | 16000 years                                                                                               | 24000 years                                                                                                         |
| Elapsed time rate                    | -----                                                                                                     | -----                                                                                                     | -----                                                                                                     | 0.68                                                                                                                |
| Rupture Probability in next 30 years | 0.2 %                                                                                                     | -----                                                                                                     | 0.2 %                                                                                                     | 0.1 %                                                                                                               |



Table S2: Characteristics of the behavioral segments of the Akita-Iwate active reverse faults (AIST 2013).

| Symbol                               | a                                                                                                         | b                                                                                                         | c                                                                                                         | d                                                                                                            | e                                                                                                                                                          | f                                                                                                           | g                                                                                                                                               | h                                                                                                                                                  | i                                                                                                       | j                                                                                                       |
|--------------------------------------|-----------------------------------------------------------------------------------------------------------|-----------------------------------------------------------------------------------------------------------|-----------------------------------------------------------------------------------------------------------|--------------------------------------------------------------------------------------------------------------|------------------------------------------------------------------------------------------------------------------------------------------------------------|-------------------------------------------------------------------------------------------------------------|-------------------------------------------------------------------------------------------------------------------------------------------------|----------------------------------------------------------------------------------------------------------------------------------------------------|---------------------------------------------------------------------------------------------------------|---------------------------------------------------------------------------------------------------------|
| Name                                 | Ukai                                                                                                      | Hanamaki                                                                                                  | Kitakami-nishi                                                                                            | Shizukuishibonchi-seien                                                                                      | Kawafune                                                                                                                                                   | Warikurayama                                                                                                | Tazawako-toho                                                                                                                                   | Senya                                                                                                                                              | Kanazawa                                                                                                | Omoriyama                                                                                               |
| Description                          | N-S trending west-dipping reverse fault along the western margin of the Kitakami Basin in northern Honshu | N-S trending west-dipping reverse fault along the western margin of the Kitakami Basin in northern Honshu | N-S trending west-dipping reverse fault along the western margin of the Kitakami Basin in northern Honshu | N-S trending west-dipping reverse fault along the western margin of the Shizukuishi Basin in northern Honshu | NNE-SSW trending west-dipping reverse fault along the eastern margin of the Mahiru Mountains in northern Honshu, ruptured during the 1896 Rikuu earthquake | N-S trending west-dipping reverse fault along the eastern margin of the Mahiru Mountains in northern Honshu | N-S trending east-dipping reverse fault along the eastern shore of Lake Tazawa in northern Honshu, partly ruptured during 1896 Rikuu earthquake | N-S trending east-dipping reverse fault along the eastern margin of the Yokote Basin in northern Honshu, ruptured during the 1896 Rikuu earthquake | N-S trending east-dipping reverse fault along the eastern margin of the Yokote Basin in northern Honshu | N-S trending east-dipping reverse fault along the eastern margin of the Yokote Basin in northern Honshu |
| Trend                                | 10°                                                                                                       | 10°                                                                                                       | 350°                                                                                                      | 10°                                                                                                          | 20°                                                                                                                                                        | 0°                                                                                                          | 0°                                                                                                                                              | 10°                                                                                                                                                | 0°                                                                                                      | 350°                                                                                                    |
| Dip                                  | 45° W                                                                                                     | 45° W                                                                                                     | 45° W                                                                                                     | 45° W                                                                                                        | 45° W                                                                                                                                                      | 45° W                                                                                                       | 45° E                                                                                                                                           | 30°E                                                                                                                                               | 45° E                                                                                                   | 45° E                                                                                                   |
| Length                               | 11 Km                                                                                                     | 42 Km                                                                                                     | 27 Km                                                                                                     | 21 Km                                                                                                        | 24 Km                                                                                                                                                      | 17 Km                                                                                                       | 10 Km                                                                                                                                           | 24 Km                                                                                                                                              | 17 Km                                                                                                   | 23 Km                                                                                                   |
| Sense of faulting                    | Reverse                                                                                                   | Reverse                                                                                                   | Reverse                                                                                                   | Reverse                                                                                                      | Reverse                                                                                                                                                    | Reverse                                                                                                     | Reverse                                                                                                                                         | Reverse                                                                                                                                            | Reverse                                                                                                 | Reverse                                                                                                 |
| Upthrown side                        | West                                                                                                      | West                                                                                                      | West                                                                                                      | West                                                                                                         | West                                                                                                                                                       | West                                                                                                        | East                                                                                                                                            | East                                                                                                                                               | East                                                                                                    | East                                                                                                    |
| Slip rate                            | 0.0 m/K years                                                                                             | 0.6 m/K years                                                                                             | 0.2 m/K years                                                                                             | 0.6 m/K years                                                                                                | 0.1 m/K years                                                                                                                                              | 0.0 m/K years                                                                                               | 0.3 m/K years                                                                                                                                   | 0.8 m/K years                                                                                                                                      | 0.3 m/K years                                                                                           | 0.2 m/K years                                                                                           |
| Slip per Event                       | -----                                                                                                     | 4.9 m                                                                                                     | 3.1 m                                                                                                     | 2.4 m                                                                                                        | 2.2 m                                                                                                                                                      | -----                                                                                                       | 1.2 m                                                                                                                                           | 2.9 m                                                                                                                                              | 2.0 m                                                                                                   | 2.7 m                                                                                                   |
| Recurrence Interval                  | -----                                                                                                     | 8200 years                                                                                                | 13000 years                                                                                               | 4300 years                                                                                                   | 22000 years                                                                                                                                                | -----                                                                                                       | 3900 years                                                                                                                                      | 3700 years                                                                                                                                         | 6700 years                                                                                              | 16000 years                                                                                             |
| Elapsed time rate                    | -----                                                                                                     | 0.51                                                                                                      | -----                                                                                                     | 0.41                                                                                                         | 0.0                                                                                                                                                        | -----                                                                                                       | -----                                                                                                                                           | 0.03                                                                                                                                               | -----                                                                                                   | -----                                                                                                   |
| Rupture Probability in next 30 years | -----                                                                                                     | 0.4 %                                                                                                     | 0.2 %                                                                                                     | 0.7 %                                                                                                        | 0.1 %                                                                                                                                                      | -----                                                                                                       | 0.8 %                                                                                                                                           | 0.8 %                                                                                                                                              | 0.5 %                                                                                                   | 0.2 %                                                                                                   |

Table S2: Cont.

| Symbol                               | <b>k</b>                                                   | <b>l</b>                                                       | <b>m</b>                                                   | <b>n</b>                                                                              |
|--------------------------------------|------------------------------------------------------------|----------------------------------------------------------------|------------------------------------------------------------|---------------------------------------------------------------------------------------|
| Name                                 | Takinosawa                                                 | Nakacho                                                        | Toridame                                                   | Kitayuri                                                                              |
| Description                          | N-S trending west-dipping reverse fault in northern Honshu | NNE-SSW trending west-dipping reverse fault in northern Honshu | N-S trending east-dipping reverse fault in northern Honshu | N-S trending east-dipping reverse fault along the western offshore of northern Honshu |
| Trend                                | 0°                                                         | 20°                                                            | 0°                                                         | 0°                                                                                    |
| Dip                                  | 45° W                                                      | 45° W                                                          | 45° E                                                      | 45° E                                                                                 |
| Length                               | 18 Km                                                      | 9 Km                                                           | 11 Km                                                      | 29 Km                                                                                 |
| Sense of faulting                    | Reverse                                                    | Reverse                                                        | Reverse                                                    | Reverse                                                                               |
| Upthrown side                        | West                                                       | West                                                           | East                                                       | East                                                                                  |
| Slip rate                            | 0.0 m/K years                                              | 0.1 m/K years                                                  | 0.0 m/K years                                              | 0.9 m/K years                                                                         |
| Slip per Event                       | -----                                                      | -----                                                          | -----                                                      | 3.4 m                                                                                 |
| Recurrence Interval                  | -----                                                      | -----                                                          | -----                                                      | 3600 years                                                                            |
| Elapsed time rate                    | -----                                                      | -----                                                          | -----                                                      | 0.41                                                                                  |
| Rupture Probability in next 30 years | -----                                                      | -----                                                          | -----                                                      | 0.8 %                                                                                 |

Table S3: Characteristics of the behavioral segments of the Fukushima active reverse faults (AIST 2013).

| Symbol                               | <b>a</b>                                                                                                     | <b>b</b>                                                                                                                                                 | <b>c</b>                                                                                                     | <b>d</b>                                                                                                                      |
|--------------------------------------|--------------------------------------------------------------------------------------------------------------|----------------------------------------------------------------------------------------------------------------------------------------------------------|--------------------------------------------------------------------------------------------------------------|-------------------------------------------------------------------------------------------------------------------------------|
| Name                                 | Watari                                                                                                       | Haramachi                                                                                                                                                | Namie                                                                                                        | Sangunmori                                                                                                                    |
| Description                          | N-S trending west-dipping reverse fault along the eastern margin of the Abukuma Mountains in northern Honshu | N-S trending left-lateral strike-slip fault with west-side-up vertical displacement along the eastern margin of the Abukuma Mountains in northern Honshu | N-S trending west-dipping reverse fault along the eastern margin of the Abukuma Mountains in northern Honshu | N-S trending left-lateral strike-slip fault with east-side-up vertical displacement in the Abukuma Mountains, northern Honshu |
| Trend                                | 350°                                                                                                         | 350°                                                                                                                                                     | 350°                                                                                                         | 0°                                                                                                                            |
| Dip                                  | 80° W                                                                                                        | 90° V                                                                                                                                                    | 80° W                                                                                                        | 90° V                                                                                                                         |
| Length                               | 21 Km                                                                                                        | 21 Km                                                                                                                                                    | 53 Km                                                                                                        | 15 Km                                                                                                                         |
| Sense of faulting                    | Reverse                                                                                                      | L-lateral                                                                                                                                                | Reverse                                                                                                      | L-lateral                                                                                                                     |
| Upthrown side                        | West                                                                                                         | West                                                                                                                                                     | West                                                                                                         | East                                                                                                                          |
| Slip rate                            | 0.1 m/K years                                                                                                | 0.1 m/K years                                                                                                                                            | 0.0 m/K years                                                                                                | 0.1 m/K years                                                                                                                 |
| Slip per Event                       | 2.4 m                                                                                                        | 1.5 m                                                                                                                                                    | -----                                                                                                        | 1.7 m                                                                                                                         |
| Recurrence Interval                  | 24000 years                                                                                                  | 10000 years                                                                                                                                              | -----                                                                                                        | 17000 years                                                                                                                   |
| Elapsed time rate                    | -----                                                                                                        | 0.20                                                                                                                                                     | -----                                                                                                        | -----                                                                                                                         |
| Rupture Probability in next 30 years | 0.1 %                                                                                                        | 0.3 %                                                                                                                                                    | -----                                                                                                        | 0.2 %                                                                                                                         |
